# Roles of adenosine and cytosine methylation changes and genetic mutations in adaptation to different temperatures

Matthieu Bruneaux<sup>1\*†</sup>, Ilkka Kronholm<sup>1\*</sup>, Roghaieh Ashrafi<sup>1</sup>,  
Tarmo Ketola<sup>1</sup>

October 28, 2019

<sup>1</sup>Department of Biological and Environmental Science, University of Jyväskylä, Finland

\*Joint first authors

†Corresponding author: Matthieu Bruneaux, [matthieu.bruneaux@ens-lyon.org](mailto:matthieu.bruneaux@ens-lyon.org)

### Abstract

2        Epigenetic modifications have been found to be involved in evolution, but  
4        the relative contributions of genetic and epigenetic variation in adaptation are  
6        unknown. Furthermore, previous studies on the role of epigenetic changes in  
8        adaptation have nearly exclusively focused on cytosine methylation in eukary-  
10        otes. We collected phenotypic, genetic, and epigenetic data from populations of  
12        the bacterium *Serratia marcescens* that had undergone experimental evolution  
14        in contrasting temperatures to investigate the relationship between environment,  
16        genetics, epigenetic, and phenotypic traits. The genomic distribution of methy-  
18        lated adenosines (m6A) pointed to their role in regulation of gene expression,  
while cytosine methylation (m4C) likely has a different role in *S. marcescens*.  
We found both environmentally induced and likely spontaneous methylation  
changes. There was very little indication that methylation changes were un-  
der genetic control. Decomposition of phenotypic variance suggested that both  
genetic and epigenetic changes contributed to phenotypic variance with slightly  
higher contribution from genetic changes. Overall, our results suggest that while  
genetic changes likely are responsible for the majority of adaptation, adenosine  
methylation changes have potential to contribute to adaptation as well.

**Keywords:** Adenosine methylation, single molecule real-time sequencing, parti-  
20        tioning of phenotypic variance, experimental evolution.

## 1 Introduction

22 The traditional view of evolution is that adaptation proceeds via DNA sequence changes.  
23 However, this view has been challenged in recent years as some epigenetic changes, such  
24 as DNA methylation changes, have been found to be heritable. Epigenetic changes that  
25 are inherited could potentially affect evolution (Jablonka and Raz, 2009; Day and Bon-  
26 duriansky, 2011; Danchin et al., 2011; Kronholm and Collins, 2016). While convincing  
27 cases of epigenetic inheritance do exist, the role of epigenetic variation in evolution  
28 has also been met with skepticism (Charlesworth et al., 2017), the main argument for  
29 caution being that despite frequent observations we know very little about the relative  
30 contributions of genetic and epigenetic variation to adaptation.

Epigenetic variation can be divided into two groups: spontaneous epigenetic varia-  
32 tion and induced epigenetic variation (Kronholm, 2017). Spontaneous epigenetic varia-  
33 tion is analogous to genetic mutations, such that epigenetic changes occur at a certain  
34 rate and are random with respect to fitness. Mutation accumulation experiments in  
35 plants have shown that cytosine methylation changes do exhibit these kind of changes  
36 and they occur at much higher rates than genetic mutations (Becker et al., 2011;  
37 Schmitz et al., 2011; van der Graaf et al., 2015). Modeling studies have shown that  
38 spontaneous epigenetic variation has the potential to affect evolutionary dynamics.  
39 The different rates of epigenetic and genetic changes can cause a two-phase dynamic  
40 where adaptation happens first via epigenetic changes, with genetic changes eventually  
41 replacing epigenetic changes (Klironomos et al., 2013; Kronholm and Collins, 2016).  
42 The second category of epigenetic changes are induced changes as a result of a specific  
43 environmental signal or developmental stage and are guided by an underlying genetic  
44 program. These changes can be seen as a mechanism of phenotypic plasticity or trans-  
45 generational effects, and there are many examples of such phenomena in plants (Luna  
46 and Ton, 2012; Wibowo et al., 2016; Herman and Sultan, 2016; Zheng et al., 2017).

So far empirical results have lacked behind theoretical models as it has been diffi-  
48 cult to disentangle the contributions of epigenetic and genetic variation to adaptation.

Several studies have investigated the extent of natural epigenetic variation (Richards  
50 et al., 2017), but in many cases effects of genetic changes cannot be excluded. It has  
also been shown that considerable amount of DNA methylation variation is under ge-  
52 netic control (Dubin et al., 2015; Hagmann et al., 2015). Nevertheless, evolutionary  
experiments with microbes suggest that epigenetic changes can contribute to adap-  
54 tation (Wang et al., 2015; Kronholm et al., 2017) and that a two-phase dynamic of  
epigenetic changes followed by genetic adaptation can happen (Stajic et al., 2019).

56 While examples of inherited epigenetic changes and their involvement in adaptation  
exist, we don't understand the relative importance of epigenetic and genetic variation in  
58 evolution. Moreover, the majority of empirical work has focused on DNA methylation,  
in particular studying the role of 5-methylcytosine in eukaryotes. Other modifications  
60 such as adenosine methylation, that is common in prokaryotes (Ratel et al., 2006) but  
which occurs in eukaryotes as well (Iyer et al., 2016), have received much less attention  
62 (but see Ma et al. (2019)).

Prokaryotes exhibit several types of methylated DNA bases in their genomes: C5-  
64 methylcytosine (m5C), which is historically the best studied methylated base in eukary-  
otes, N4-methylcytosine (m4C) and N6-methyladenosine (m6A) (Ratel et al., 2006).  
66 Such DNA modifications can influence gene expression (Bird, 2002; Casadesús and  
Low, 2006) and some of them are heritable (Bird, 2002). Some works in prokary-  
68 otes have pointed the potential for adenosine methylation to be involved in adaptation  
(Adam et al., 2008; Atack et al., 2015). The roles of adenosine methylation in bacte-  
70 ria are multiple: protection against foreign DNA by restriction-modification systems,  
gene expression regulation, DNA replication and repair, cell-cycle regulation and phase  
72 variation (Sánchez-Romero et al., 2015). Adenine methyltransferase (MT) genes can  
either be essential for cell viability (Stephens et al., 1996), result in global transcription  
74 changes when mutated (Casselli et al., 2018) or even be mutated without affecting cell  
survival nor transcription levels (Seshasayee, 2007).

76 We studied the role of epigenetics in evolution by addressing the following points:



(1) quantifying in detail the epigenetic variation related to m4C and m6A in the bacterial model *Serratia marcescens* evolving in different temperatures, (2) determining if epigenetic variation contributed to adaptation, and (3) comparing the relative contributions of epigenetic and genetic variation to adaptation. We address these questions by phenotyping and single molecule real-time (SMRT) sequencing of bacterial clones from an experimental evolution experiment conducted at three contrasting thermal regimes: 24–38°C fluctuating and 31 °C and 38 °C constant environments (Ketola et al., 2013).

## 2 Methods

### 2.1 Origin of sequenced clones (experimental evolution)

We used bacteria clones that were obtained from a previous evolution experiment (Ketola et al., 2013). Briefly, we let populations of *Serratia marcescens* initiated from a single common ancestor clone evolve under either constant or fluctuating temperatures during three weeks (treatments: constant 31 °C, constant 38 °C or daily variation between 24 °C and 38 °C) (Ketola et al., 2013) (Supplementary Figure S1). Note that lines evolved in 38 °C were not reported in Ketola et al. (2013). The experiment lasted approximately 70 generations. After experimental evolution, individual clones were stored at –80 °C in 50% glycerol. We randomly selected one clone from each population for sequencing (10 from the 31 °C treatment, 8 from the 38 °C treatment and 10 from the fluctuating treatment, i.e. 28 evolved clones sequenced in total). As a reference, and since unfortunately the frozen stocks of the common ancestor used to initiate the evolved populations could not be successfully revived prior to sequencing, we also sequenced the stock clone received from ATCC and from which the single common ancestor itself was derived (Supplementary Figure S1).

## 100 2.2 Phenotypic measurements

We used the phenotypic data from [Ketola et al. \(2013\)](#), which included measurements  
102 of growth rate and yield at constant 24 °C, 31 °C and 38 °C for the evolved clones.  
These phenotypes will be called *temperature-related traits* from now on. In addition,  
104 growth rate and yield were measured in a series of novel environments: under redox  
balance stress (1 mg/ml dithiotreitol), in the presence of the ciliate predator *Tetrahy-*  
106 *mena thermophila* and in the presence of the lytic bacteriophage PPV. These traits  
will be called *coselected traits* from now on. For further details on these phenotypic  
108 measurements, see [Ketola et al. \(2013\)](#).

This phenotypic dataset was enriched with two additional traits: *strain virulence*  
110 (*S. marcescens* is an opportunistic pathogen of insects ([Grimont and Grimont, 1978](#);  
[Flyg et al., 1980](#))) and *prophage activation* (the genome of the reference strain contains  
112 several prophages, and one of them could be activated in our experimental conditions).  
The full technical detail of how these traits were measured is presented elsewhere  
114 ([Bruneaux et al., 2019](#)), but a brief description is given here. Strain virulence was  
estimated by measuring the survival time of wax moth larvae (*Galleria mellonella*)  
116 after injection with 5 µl of an overnight clone culture in SPL 1 % at 31 °C. Larvae  
were kept at 24 °C or 31 °C after injection, providing a measure of clone virulence at  
118 two temperatures. Prophage activation was measured by growing the clones under five  
different temperature treatments in SPL 1 %. Each treatment lasted two days, and the  
120 temperatures for the first and second day for each treatment were (first/second day  
temperatures): 31/31°C, 24/24°C, 38/38°C, 24/38°C and 38/24°C. After the second  
122 day and in order to distinguish between phage DNA inside bacteria and inside free-  
floating phage particles, each clone culture was harvested into two paired samples:  
124 one native sample and one supernatant sample obtained after mild centrifugation to  
pellet most of the cells while leaving phage particles in suspension. Both samples were  
126 then DNase-treated and incubated at 95 °C to release DNA from bacteria cells and  
potential phage particles. The amount of chromosomal DNA and of prophage DNA was

128 quantified with qPCR in all samples using two pairs of primers targetting the prophage  
sequence and a chromosomal sequence outside the prophage region. A Bayesian model  
130 using the four DNA quantities generated from each culture well (prophage DNA and  
non-prophage DNA in both native sample and supernatant) allowed to estimate the  
132 proportion of prophage DNA copies which were not contained in bacterial cells in the  
cultures.

### 134 **2.3 Sequencing and genome annotation**

We used single molecule real-time sequencing using the PacBio platform to sequence  
136 the evolved clones and the reference. Since no template amplification takes place prior  
to sequencing on a PacBio platform in order to detect base modifications, relatively  
138 large amounts of DNA per clone are necessary. Selected clones were thawed and grown  
overnight in 150 ml of liquid medium and DNA was extracted using the Wizard Ge-  
140 nomic DNA Purification Kit from Promega (WI, USA). One DNA sample (20 to 60  $\mu$ g)  
per clone was sequenced by the DNA Sequencing and Genomics Laboratory of the  
142 University of Helsinki on a PacBio RS II sequencing platform using P6-C4 chemistry.  
Two single-molecule real-time sequencing (SMRT) cells were run per DNA sample.

144 PacBio software and recommended protocols were used with default parameters  
for the assembly and modification calling pipeline. For each strain, reads from the  
146 RS II instrument were assembled with PacBio RS\_HGAP\_Assembly.3, as implemented  
in SMRTportal 2.3.0. The resulting assembly for each strain was processed with the  
148 Gap4 program to generate *de novo* a first draft sequence for this strain and to circularize  
it. PacBio RS\_Resequencing.1 protocol was then run 2 to 3 times for each sample to  
150 map the reads to the draft sequence and generate a consensus sequence for each strain.  
The average coverage of the draft chromosome per strain was high (from 102 to 413,  
152 average 268). Given the high coverage of the chromosome sequences across all strains,  
the base calling was considered accurate and genetic variants were directly called from  
154 an alignment of the 29 strains chromosomes built using Mugsy ([Angiuoli and Salzberg,](#)

2011).

156 Inter-pulse duration (IPD) ratios were used with the PacBio `RS.Modification` and  
157 `Motif_Analysis` protocol to detect modified bases and methylation sequence motifs.  
158 Positions detected as modified by this protocol were labelled as either m6A, m4C or  
159 “modified base” if the modification type could not be identified. The estimated fraction  
160 of modified copies (methylation fraction) was provided for m6A and m4C bases. The  
161 protocol only reports bases for which IPD ratio is significantly different from 1, which  
162 makes it highly coverage-dependent for modifications with weak signal such as m4C  
163 and m5C. In order to extract the estimated IPD ratios for all bases and not only the  
164 ones detected as modified by this protocol, we also ran `ipdSummary` separately using  
all the aligned subreads for each sample.

## 166 **Genome annotation**

We used a previously published and annotated genome for *Serratia marcescens* strain  
167 ATCC 13880 (RefSeq entry `GCF_000735445.1`) to annotate the chromosome sequence  
of the reference strain used in our experiment. CDS from the RefSeq entry were  
168 aligned to the reference genome using blast (Camacho et al., 2009) and for each CDS  
the best high-scoring segment pair was used to propagate annotation to the reference  
169 genome if its length was at least 99% of the CDS length. After annotating CDS, they  
were assembled into operons using the Operon Mapper server ([http://biocomputo.ibt.unam.mx/operon\\_mapper/](http://biocomputo.ibt.unam.mx/operon_mapper/),  
170 `Taboada et al. (2018)`). The location of the origin of  
replication was determined using the DoriC server (Gao et al., 2012).

## 176 **2.4 Determination of tetramer composition bias in *Serratia marcescens* genome**

177 Oligonucleotide usage bias in prokaryotic genomes exists as a result of evolutionary  
constraints, such as codon usage and palindrome avoidance (Rocha et al., 1998). In  
178 order to test if the target oligonucleotide sequence of the adenosine methylase (5'-

GATC-3') was under differential selection depending on the genomic context, which  
182 could indicate a potential role of m6A methylation in cell function, we calculated  
the tetramer composition bias in two subsets of genomic segments: genes (CDS) and  
184 promoter regions (defined as 200-bp-long regions immediately upstream of operon-  
leading CDS). We used the sequences corresponding to the (+) strand of each gene  
186 or of the CDS downstream of each promoter region. For each of the 256 possible  
tetramers, we counted the number of observed occurrences in each of those sequence  
188 sets,  $N_{\text{tet}}$ . We compared those observed values with expected number of occurrences,  
determined either by permutation of the bases within each genomic segment or based  
190 on a Markov chain. The Markov chain takes into account the underlying biases that  
might exist in the frequencies of dimers and trimers comprising each tetramer, while the  
192 permutation approach only takes into account biases in frequencies of the A, T, G, C  
monomers. In the permutation approach, the expected number of occurrences of a given  
194 tetramer for a given genome subset is the average of the number of occurrences obtained  
across  $n_{\text{perm}}$  permutations of the bases within each segment of this subset:  $E_{\text{tet}}^{\text{perm}} =$   
196  $\frac{1}{n_{\text{perm}}} \sum_{i=1}^{n_{\text{perm}}} N_{\text{tet},i}$ . In the Markov chain approach, the expected number of occurrences  
of a given tetramer of composition  $b_1b_2b_3b_4$  is:  $E_{\text{tet}}^{\text{MC}} = \frac{N_{b_1b_2b_3} \times N_{b_2b_3b_4}}{N_{b_2b_3}}$  (Rocha et al., 1998;  
198 Pride et al., 2003). Deviations in the usage of each tetramer from expectation were  
calculated as  $D_{\text{perm}} = \frac{N_{\text{tet}} - E_{\text{tet}}^{\text{perm}}}{E_{\text{tet}}^{\text{perm}}}$  and  $D_{\text{MC}} = \frac{N_{\text{tet}} - E_{\text{tet}}^{\text{MC}}}{E_{\text{tet}}^{\text{MC}}}$  for the permutation and Markov  
200 chain approaches, respectively.

## 2.5 Detection of methylated positions (MP) and regions (MR) 202 of interest

While some methylated positions (MP) in prokaryotes occur at specific loci (such as  
204 GATC motifs) targeted by restriction-modification systems or by orphan methylases,  
other MP might not be associated with an identified motif. For those, identifying  
206 larger methylated regions (MR) spanning several bases and using their average methy-  
lation status for strain comparison instead of individual MP can be a more biologically

208 meaningful approach, as is done in eukaryotes for m5C (e.g. [Hagmann et al. \(2015\)](#)).

We aimed at identifying both methylated *positions* (m6A) and methylated *regions* (m4C) of interest, focusing on partially methylated m6A in GATC motifs for the former and using a kernel density (KD) approach for the latter to detect regions where cytosine modification into m4C was more frequent than expected by chance.

### Detection of partially methylated m6A loci in GATC motifs

214 *Serratia marcescens*, like other gamma-proteobacteria, harbours a Dam enzyme methylating adenosines of GATC motifs ([Blow et al., 2016](#)). Most GATC motifs are usually fully methylated, but hemimethylated locations can regulate DNA replication and cell division while some other locations can be left unmethylated when another regulatory protein already binds DNA and prevents Dam from methylating it ([Casadesús and Low, 2006](#)). This competition for access to GATC motifs between Dam and regulatory proteins allows for heritable regulation of gene expression in bacteria lineages ([Braaten et al., 1994](#)). To identify GATC loci which were not fully methylated in our dataset, we considered for each GATC locus the estimated fractions of modified adenosines on the plus and minus strand for each strain, as reported by the PacBio pipeline. Loci for which no fraction was reported for a given strain were assigned a value of 0 (i.e. completely unmethylated) for that strain. Assuming that the distribution of modified fractions on the plus and minus strand for fully methylated loci would follow a truncated bivariate distribution centered around (1, 1) (i.e. both strands fully methylated), we defined the set of partially methylated GATC loci of interest for downstream analyses as the loci which presented modified fractions on the plus and minus strands which deviated from the point of full methylation at coordinates (1, 1) more than four times the average quadratic distance to (1, 1), in at least one strain (Supplementary Figure S2). We checked that low estimated values of methylated fractions were not due to low coverage of the corresponding GATC loci by examining the relationship between coverage bins and estimated methylated fraction (Supplementary Figure S3).

### Detection of clustered m4C based on kernel density estimates

236 While studies of m5C in eukaryotes have profitably used Hidden Markov Models  
(HMM) to identify clusters of methylated cytosines, our attempts at using HMM were  
238 unsuccessful as most of the predicted segments after HMM fitting only contained one or  
two m4C, which might be due to the dispersed nature of modified cytosines in *Serratia*  
240 *marcescens* genome compared to modified cytosines in eukaryotes which tend to be  
aggregated in CpG islands. We thus chose to use a simpler approach to detect regions  
242 which were enriched in m4C based on kernel density estimates.

Each cytosine base on either strand of the reference genome was flagged as m4C  
244 if it was detected as such in at least one of the sequenced strains, yielding 77 478  
m4C locations with an average spacing of 66 bases between them. Using a grid of  $2^{17}$   
246 evenly spaced points along the reference genome (i.e. about 40 bases away from each  
other, slightly less than the average spacing of observed m4C positions), we calculated  
248 a kernel density estimate with a Gaussian kernel with a standard deviation of 65 bases.  
This observed density estimate was then compared with density estimates generated by  
250 randomly permuting the 77 478 m4C locations among the 3 059 758 cytosine locations  
on the reference genome: a kernel density estimate was produced for each permuted  
252 dataset at the same grid points and with the same kernel parameters as for the observed  
density estimate. We performed 100 000 permutations and identified candidate grid  
254 points for which the proportion of permuted estimates above the observed estimate  
was  $< 0.001$ , suggesting that the frequency of m4C bases was higher than expected by  
256 chance in the genome grid cells centered at those grid points. The advantage of this  
permutation approach is that it takes into account the local distribution of cytosine  
258 bases across the genome, since it is maintained in the permuted datasets. Consecutive  
candidate grid cells were assembled into segments while single candidate grid cells  
260 were discarded, yielding a final number of 167 segments that were used as candidate  
“clusters” of m4C. For each sequenced strain and each “cluster”, we calculated the  
262 value of the corresponding m4C epiallele by averaging the methylated fraction of all

m4C observed in the cluster region. Positions which were not detected as m4C in a  
264 given strain (but were in at least another one) were assigned a methylation fraction of  
0 for this strain before calculating the average epiallele. We note that this approach  
266 could result in underestimating the m4C fraction for cytosines with lower coverage  
as we observed that average coverage for m4C bases with low estimated methylation  
268 fraction tended to be slightly higher than for bases with high methylation fraction  
(Supplementary Figure S4), which is expected given the relatively weak kinetic signal  
270 produced by m4C modification.

## 2.6 Association between epigenetic changes and genetic mu- 272 tations

The association between epigenetic changes and genetic mutations was investigated  
274 using the methylated positions (for m6A) or regions (for m4C) of interest identified as  
described above and the genetic mutations for which the minor allele was present in at  
276 least two of the sequenced strains (i.e. genetic mutations present in a single strain were  
not used). For each genetic mutation, we built a quantile-quantile curve comparing  
278 a uniform distribution of  $p$ -values on  $[0, 1]$  with the distribution of observed  $p$ -values  
from t-tests between the genetic mutation and the epigenetic changes. In order to  
280 determine if the genetic mutation under consideration was more strongly associated  
with epigenetic changes than expected by chance, we then compared this quantile-  
282 quantile curve with a set of similar quantile-quantile curves obtained from permuted  
datasets where the clones labels were randomly shuffled. This permutation approach  
284 allowed us to account for the effect of our dataset structure (such as allele frequencies  
and distribution of methylated levels) on the expected distribution of  $p$ -values.



## 286 2.7 Decomposition of phenotypic variance

To quantify the relative contributions of genetics and epigenetics to the phenotypic variance, we used random effect models in which the variance component was split into genetic, epigenetic and residual variance (Thomson et al., 2018). The model we used for each trait was:

$$\mathbf{y} = \text{MVN}(\mathbf{0}, \sigma_{gen}^2 \times G) + \text{MVN}(\mathbf{0}, \sigma_{epi}^2 \times E) + \text{MVN}(\mathbf{0}, \sigma_{res}^2 \times I) \quad (1)$$

where  $\mathbf{y}$  is a column vector containing the trait values for each strain centered to a mean of 0 and scaled to a standard deviation of 1, MVN is the multivariate normal distribution parameterized by a vector of means and a variance-covariance matrix,  $\mathbf{0}$  is a column vector of zeros,  $\sigma_{gen}^2$ ,  $\sigma_{epi}^2$  and  $\sigma_{res}^2$  are the genetic, epigenetic and residual variances for the trait,  $G$  and  $E$  are the matrices of genetic and epigenetic similarity between strains, respectively, and  $I$  is the identity matrix. The genetic similarity matrix  $G$  was built from the 54 variable genetic loci observed in our dataset and the similarity between any two strains was calculated as the proportion of those loci for which the strains shared identical alleles. The epigenetic similarity matrix  $E$  was built from the methylation fractions for the partially methylated m6A epiloci in GATC motifs identified previously. First, an Euclidean distance matrix with elements  $d_{ij}$  was built from the methylation fraction data. The similarity measure between any two clones was then calculated as  $1 - (d_{ij}/(2D))$ , where  $D$  was the average distance between the reference strain and all the evolved strains. This is conceptually equivalent to measuring a phylogenetic similarity between two species as the shared evolutionary distance from the root of the phylogeny to their last common ancestor divided by the average distance from the root of the phylogeny to all observed species.

304 We run the models using the MCMCglmm package in R (Hadfield, 2010). We used an inverse-Gamma prior for each variance component, with shape 0.5 and scale 0.5 (corresponding to  $V = 1$  and  $nu = 1$  in MCMCglmm parameterization). Four chains

were run for 10 000 iterations, of which the first half was discarded as burn-in, with a  
 308 thinning of 10. Total phenotypic variance was calculated as  $\sigma_{tot}^2 = \sigma_{gen}^2 + \sigma_{epi}^2 + \sigma_{res}^2$ ,  
 and  $r_{gen}^2$ ,  $r_{epi}^2$  and  $r_{res}^2$  were calculated as  $\sigma_{gen}^2/\sigma_{tot}^2$ ,  $\sigma_{epi}^2/\sigma_{tot}^2$  and  $\sigma_{res}^2/\sigma_{tot}^2$ , respectively.

**Calculation of partial variance components.** In our experiment, epigenetic similarities could be due to genetic control, and both epigenetic and genetic similarities could be due to the evolutionary treatment. To disentangle the joint and disjoint effects of treatment, genetics and epigenetics on phenotypic variance, we fitted seven mixed models similar to the one described above, built from all possible combinations of the treatment, genetic and epigenetic variance components. The fullest model was:

$$\mathbf{y} = \text{MVN}(\mathbf{0}, \sigma_{evo}^2 \times T) + \text{MVN}(\mathbf{0}, \sigma_{gen}^2 \times G) + \text{MVN}(\mathbf{0}, \sigma_{epi}^2 \times E) + \text{MVN}(\mathbf{0}, \sigma_{res}^2 \times I) \quad (2)$$

where  $\sigma_{evo}^2$  is the treatment variance for the trait and  $T$  is the design matrix describing the evolutionary treatment corresponding to each clone. The six other models were:

$$\begin{aligned} \mathbf{y} &= \text{MVN}(\mathbf{0}, \sigma_{gen}^2 \times G) + \text{MVN}(\mathbf{0}, \sigma_{epi}^2 \times E) + \text{MVN}(\mathbf{0}, \sigma_{res}^2 \times I) \\ \mathbf{y} &= \text{MVN}(\mathbf{0}, \sigma_{evo}^2 \times T) + \text{MVN}(\mathbf{0}, \sigma_{epi}^2 \times E) + \text{MVN}(\mathbf{0}, \sigma_{res}^2 \times I) \\ \mathbf{y} &= \text{MVN}(\mathbf{0}, \sigma_{evo}^2 \times T) + \text{MVN}(\mathbf{0}, \sigma_{gen}^2 \times G) + \text{MVN}(\mathbf{0}, \sigma_{res}^2 \times I) \\ \mathbf{y} &= \text{MVN}(\mathbf{0}, \sigma_{epi}^2 \times E) + \text{MVN}(\mathbf{0}, \sigma_{res}^2 \times I) \\ \mathbf{y} &= \text{MVN}(\mathbf{0}, \sigma_{gen}^2 \times G) + \text{MVN}(\mathbf{0}, \sigma_{res}^2 \times I) \\ \mathbf{y} &= \text{MVN}(\mathbf{0}, \sigma_{evo}^2 \times T) + \text{MVN}(\mathbf{0}, \sigma_{res}^2 \times I) \end{aligned} \quad (3)$$

310 For each of those models, we calculated the proportion of the phenotypic variance  
 described by non-residual variance components, using the mean of the MCMC chain as  
 312 a point estimate. We thus obtained seven values of proportions of explained variance  
 for each phenotypic trait:  $r_{evo,gen,epi}^2$ ,  $r_{gen,epi}^2$ ,  $r_{evo,epi}^2$ ,  $r_{evo,gen}^2$ ,  $r_{epi}^2$ ,  $r_{gen}^2$  and  $r_{evo}^2$ . We  
 314 then calculated the joint and disjoint proportions explained by treatment, genetics and

epigenetics using a variation partitioning approach (Legendre and Legendre, 1998) as  
 316 depicted in the following representation:

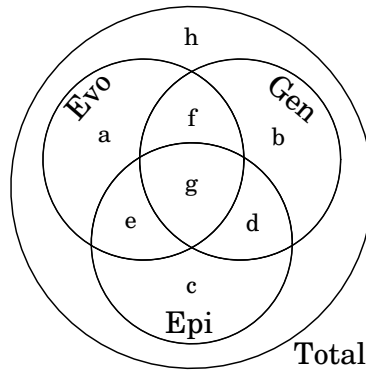

using the following formulas:

$$a = r_{evo,gen,epi}^2 - r_{gen,epi}^2$$

$$b = r_{evo,gen,epi}^2 - r_{evo,epi}^2$$

$$c = r_{evo,gen,epi}^2 - r_{evo,gen}^2$$

$$(d + g) = r_{gen}^2 + r_{epi}^2 - r_{gen,epi}^2$$

$$(f + g) = r_{gen}^2 + r_{evo}^2 - r_{evo,gen}^2$$

$$(e + g) = r_{epi}^2 + r_{evo}^2 - r_{evo,epi}^2$$

$$g = (d + g) + (f + g) + (e + g) - r_{evo}^2 - r_{gen}^2 - r_{epi}^2 + r_{evo,gen,epi}^2$$

$$d = (d + g) - g$$

$$e = (e + g) - g$$

$$f = (f + g) - g$$

$$h = 1 - r_{evo,gen,epi}^2$$

**Taking into account the effect of genetic loci associated with epigenetic changes.** After having identified the genetic loci potentially associated with epigenetic changes, we re-ran the same phenotypic variance decomposition as presented above but adding in Equations 1, 2 and 3 the fixed effect of one genetic locus (or haplotype) at a time and removing the locus (or haplotype) from the calculation of the

genetic similarity matrix. For example, when testing for the effect of haplotype  $a$  on phenotypic variance decomposition, Equation 1 would become:

$$\mathbf{y} = \beta_a \times \text{genotype}_a + \text{MVN}(\mathbf{0}, \sigma_{gen}^2 \times G_a) + \text{MVN}(\mathbf{0}, \sigma_{epi}^2 \times E) + \text{MVN}(\mathbf{0}, \sigma_{res}^2 \times I)$$

318 where  $G_a$  is the genetic similarity matrix calculated after removing the haplotype  $a$   
from the table of genetic variants. Equations 2 and 3 would be modified similarly. The  
320 obtained variance decomposition is thus providing the contribution of evolutionary  
treatment, genetic and epigenetic variations to phenotypic variance after removing the  
322 effect of haplotype  $a$  on the phenotypes.

## 2.8 Correlations between genetic, epigenetic and phenotypic 324 distances

In this study, we were interested in the overall relationships between evolutionary  
326 treatment, genetic, epigenetic and phenotypic datasets to understand how they glob-  
ally coincide with each other and draw general conclusions about evolution, rather  
328 than in pin-pointing specific genetic or epigenetic mutations responsible for phenotypic  
changes. To this effect, and as an addition to the variance decomposition approach,  
330 we used Mantel tests as implemented in the R package *vegan* (Oksanen et al., 2019) to  
investigate the association between distance measures based on each of those datasets.  
332 If strains which are close based on one distance measure also tend to be close based on  
another one, then it suggests a dependence between the underlying sets of measure-  
334 ments used to calculate those distances (Mantel and Valand, 1970). It should be noted  
that the Mantel test does not test for the independence between the sets of variables  
336 which were used to calculate the distance matrices, and that the  $R^2$  from a Mantel  
test is not the same as the  $R^2$  from correlation or regression analysis (Legendre et al.,  
338 2015).

## 3 Results

### 3.1 Genome sequences and genetic variants

The reference strain chromosome was 5 117 300 bp long, with a GC content of 59.8%.  
The genome annotation propagated 4628 out of 4697 CDS from the RefSeq entry to  
the reference genome (98.5%). 54 mutations were identified from the aligned genomes  
of the reference and evolved clones (Table 1 and Figure 1). Most of the mutations  
that occurred in coding regions were frameshifts or missense mutations. A striking  
feature of the variant map is the presence of 11 genetic mutations associated in a single  
haplotype and for which the minor allele is observed in 5 of the evolved strains from  
38 °C and in the reference genome, but in no other evolved strain (haplotype *a* in  
Supplementary Table S1). This suggests that the ancestor clone used to initiate the  
replicated populations in the evolution experiment, and which was itself derived from  
the reference strain sequenced here, actually contained at least two lineages which were  
preserved in some populations at 38 °C but in no other evolutionary treatment. We  
are thus careful to consider the haplotype *a* variants separately from the rest of the  
genetic changes in the rest of this manuscript, since those variants are likely to have  
arisen prior to the start of the evolution experiment.

Even when not taking into account variants from haplotype *a*, multiple parallel  
substitutions were observed among the evolved clones (Figure 1), and some genes in  
particular exhibited several independent mutations occurring in different strains: two  
independent mutations occurred in a deacetylase, three occurred in a galactokinase  
and three in a glycosyltransferase (Supplementary Table S1). Remarkably, those three  
genes are all involved in some steps of the biosynthesis of lipopolysaccharide. In the  
evolution experiment population sizes were on the order of  $8 \times 10^6$  cells per 400  $\mu$ L cul-  
ture well at plateau, and the fraction transferred to the next generation was 1/10 of the  
previous culture. This yields a large effective population size  $N_e = 2.6 \times 10^6$  during the  
experiment ( $N_e = N_0 g$ , where  $N_0 = 8 \times 10^5$  cells is the bottleneck size and  $g = 3.3$  is

## RESULTS

## Epigenetics and adaptation

| Type             | Location                     | Effect on protein sequence                      |
|------------------|------------------------------|-------------------------------------------------|
| Indels (31, 30*) | coding regions (13, 12*)     | frame shift (11, 10*)<br>no frame shift (2, 2*) |
|                  | non-coding regions (18, 18*) |                                                 |
| SNPs (23, 13*)   | coding regions (17, 9*)      | non-synonymous (14, 8*)<br>synonymous (3, 1*)   |
|                  | non-coding regions (6, 4*)   |                                                 |

Table 1: Summary of genetic variants across the reference and the 28 evolved strains. Counts are given in parentheses. Numbers with asterisk are counts when the variants comprising haplotype  $a$  are not taken into account.

366 the number of generations between transfers (Lenski et al., 1991)). Thus, genetic drift  
cannot explain the fixation of multiple parallel mutations in independent populations,  
368 suggesting instead that selection favoured abolishing the function of those particular  
genes. As the aim of the present study is to determine the overall relationships be-  
370 tween treatment, genetics, epigenetics and phenotypes rather than linking a particular  
mutation to phenotypic changes, we do not present here any results for the association  
372 between specific mutations and phenotypic traits, but such results are presented in  
details in a separate study (Bruneaux et al., 2019).

### 374 3.2 Overview of methylation in *Serratia marcescens* genome

#### 3.2.1 Methylated bases and methylation motifs

376 The role of methylation in bacteria is still being actively investigated, so we first exam-  
ined the overall patterns of methylation in the *Serratia* genome. For adenine methyl-  
378 tion, out of 2 057 542 adenine bases present in the bacterial chromosome, 90 804 (4.4 %)  
were detected as m6A in at least one strain by the PacBio protocol. The vast majority  
380 of those m6A were occurring in GATC motifs: out of the 90 804 positions detected as  
m6A, 76 241 (84 %) were in a GATC context. Since a total of 76 300 adenines in GATC  
382 context exist in the genome, this corresponds to a very high rate of adenine methylation

## RESULTS

## Epigenetics and adaptation

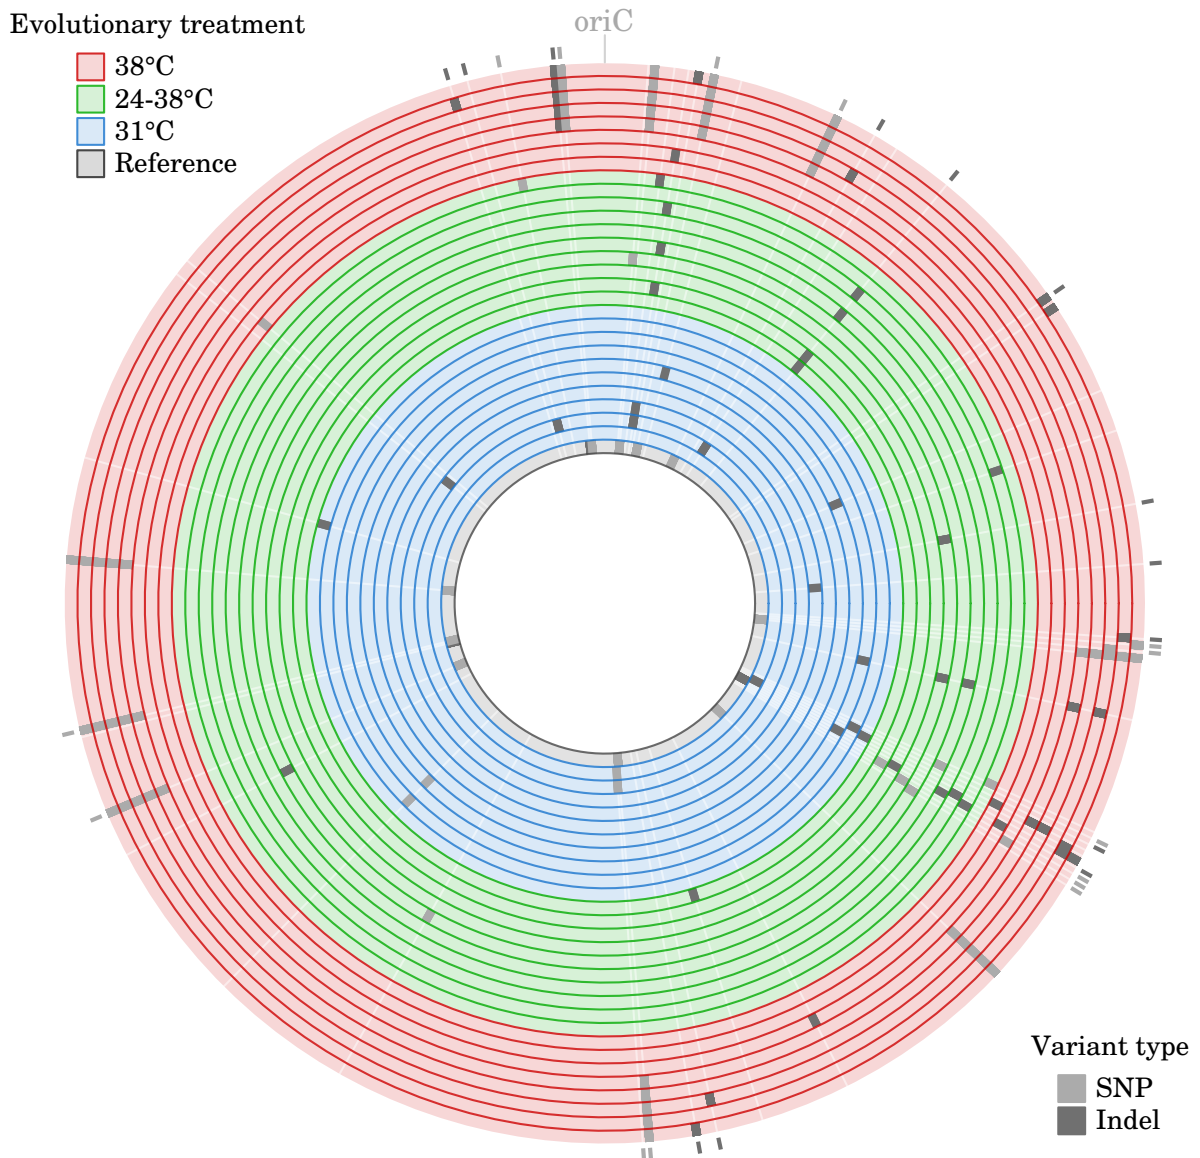

Figure 1: Distribution of genetic variants along *S. marcescens* chromosome. Each circular lane represents the chromosome sequence of one clone. Genetic variants (minor alleles) are depicted in light gray (SNP) and dark gray (indel). Markers on the outer part of the map highlight non-synonymous variants (i.e. indels resulting in a frame shift and non-synonymous SNPs).

## RESULTS

## Epigenetics and adaptation

in GATC motifs: 99.9% of GATC adenines are detected as m6A in at least one strain  
384 and 99.7% were detected in all 29 strains. Additionally, 67 711 other adenine bases  
were detected as modified (but without identifying the specific modification type) in  
386 at least one strain, of which only 25 821 were detected in at least two strains.

Out of 3 059 758 cytosine bases present in the genome, 77 481 (2.5%) were identified  
388 as m4C in at least one of the 29 sequenced strains. The average number of m4C  
detected per strain was 15 965, with a standard deviation (s.d.) of 3200. In addition,  
390 106 378 C bases (3.5% of the genome C content) were detected as modified in at least  
two strains, but without a specific modification type being identified by the PacBio  
392 protocol. Some of those unidentified modifications could be m5C, for which the kinetic  
signal is weaker than for m4C and m6A and which requires either very high coverage  
394 to identify the weak signal unambiguously or sequencing using TET-modification to  
generate a stronger kinetic signal for easier identification (Clark et al., 2013).

When detected as modified, m4C bases had an average methylated fraction of 71%  
396 (s.d. 23%) and m6A bases had an average methylated fraction of 63% (s.d. 30%)  
398 outside GATC motifs, and of 97% (s.d. 5%) inside GATC motifs.

**Methylation target sequences.** The motif finder algorithm of the PacBio pipeline  
400 detected two sets of motifs for adenosine methylation (Table 2) but no reliable motif  
for cytosine methylation. One motif set for m6A was the GATC palindrome and  
402 the other was the much rarer pair AAAGNNNNNTCG/TTTCNNNNNAGC. For  
both sets, almost all genomic locations (> 99%) were detected as modified. For m4C  
404 modifications, although no specific motif was found, the context around modified C  
bases was distinctively enriched in G, with average G abundances of 55% for the base  
406 immediately before an m4C and of 58% and 51% for the two following bases in the  
5' → 3' direction, compared to the average genomic abundance of 30% of G.



## RESULTS

## Epigenetics and adaptation

| Motif                       | Occurrences on chromosome | Detected as methylated |
|-----------------------------|---------------------------|------------------------|
| 5'– <u>GATC</u> –3'         | 38150                     | 99.8 %                 |
| 3'– <u>CTAG</u> –5'         | 38150                     |                        |
| 5'–AAAGNNNN <u>N</u> TCG–3' | 878                       | 99.7 %                 |
| 3'–TTTCNNNN <u>N</u> AGC–5' | 878                       | 99.8 %                 |

Table 2: Cognate sequence motifs for m6A modification. Methylated positions are underlined. Percentages of occurrences detected as methylated are reported as mean across the 29 sequenced strains.

### 408 3.2.2 Tetramer composition bias in *Serratia marcescens* genome

To investigate the potential link between adenosine methylation and regulation of gene  
410 expression, we searched for evidence of differential usage bias of the 5'-GATC-3' target  
sequence of the adenosine methyltransferase in promoters and gene bodies. In practice,  
412 we compared the usage bias of this target sequence with the usage bias of all other  
nucleotide tetramers. The usage bias in a given genomic region is positive if a tetramer  
414 is more abundant than expected by chance, and negative if it is rarer. Overall, the  
range of tetramer usage bias in genes and promoters was larger when measured from  
416 a permutation approach (deviation ranging from -0.80 to +1.23) than from a Markov  
chain approach (-0.42 to 0.83). The correlation between values obtained from the two  
418 approaches was moderate (Spearman's  $\rho = 0.30$ ), indicating that tetramer biases are  
strongly related to biases in dimers and trimers usage, such as codon usage bias, which  
420 are taken into account by the Markov chain approach but not by the permutation  
approach. Most of the variation in tetramer usage bias was positively correlated be-  
422 tween genes and promoters (e.g. Spearman's  $\rho = 0.58$  for Markov chain estimates), but  
some tetramers exhibited large differences between their in-gene and in-promoter usage  
424 biases (Figure 2). Remarkably, 5'-GATC-3' showed one of the largest distortions in us-  
age bias between gene and promoter regions among all tetramers, in both approaches.  
426 The 5'-GATC-3' tetramer was more abundant in genes and rarer in promoters than  
expected by chance, even when taking into account biases in dimer and trimer usage  
428 (Figure 2).

## RESULTS

## Epigenetics and adaptation

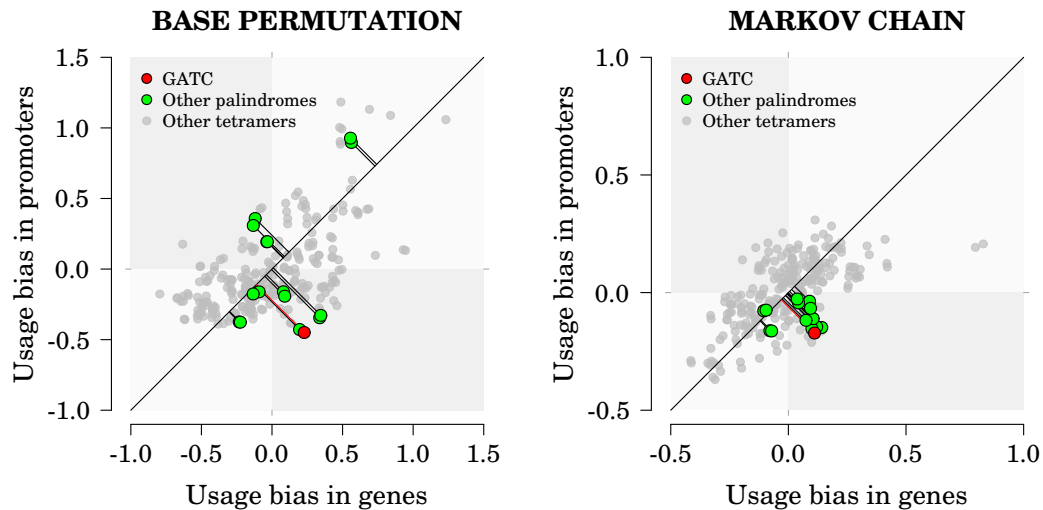

Figure 2: Tetramer usage bias in genes and promoters. Left side panel, tetramer usage bias determined from observed frequencies of single nucleotides (permutation approach). Right side panel, tetramer usage bias taking into account the observed frequencies of dimers and trimers (Markov chain approach). A positive usage bias means that a given tetramer is observed more frequently than expected by chance. The distance between an observation and its projection on the identity line (shown for palindromic tetramers) shows how imbalanced is the usage bias between promoters and genes: observations below the identity line represents tetramers which are rare in promoters compared to genes, and vice-versa.

### 3.2.3 Genomic methylation profiles

430 We investigated the profiles of m4C and m6A methylated fractions at the boundaries  
between the promoter regions (which were defined as the regions immediately upstream  
432 of the leading CDS of the predicted operons) and the coding regions. From a base-  
composition perspective, GC content was lower in promoter regions. In coding regions,  
434 we observed a trimodal distribution of GC content in the three codon positions, which  
is a sign of codon usage bias (Figure 3, top panel). Concerning the methylation pro-  
436 files, we did not observe any striking spatial pattern for average base m4C methylation  
in relation with operon and CDS structure: levels of m4C methylation were fairly  
438 stable around operon starts and were consistent with genome-wide average m4C lev-  
els (Figure 3, middle panel), even though a t-test comparing the average base m4C  
440 methylation  $\pm$  500 bp around the operon starts suggested a slightly higher average  
m4C methylation in the promoter region (0.407%) than in the coding region (0.370%)

442 ( $t = -4.95$ ,  $df = 975.78$ ,  $p < 0.001$ ). On the other hand, we observed that levels  
of adenosine methylation into m6A clearly decreased before the translation start site  
444 (Figure 3, bottom panel), implying that adenosine methylation in promoters might in-  
terfere with transcription. After translation start adenosine methylation levels quickly  
446 returned to background levels in the operon coding region. While we cannot determine  
if low m6A methylation levels are a cause or a consequence of transcription initiation,  
448 these observations suggest that adenosine methylation (m6A) is functionally related to  
transcription in *S. marcescens* while m4C is not. This does not preclude that other  
450 cytosine modifications such as m5C might have a role in transcription regulation: for  
example, the average IPD ratio profile of cytosine also shows a decrease before the  
452 translation start site of the leading CDS, which could be a side effect of the m6A  
methylation profile in this region but could also indicate that cytosine modifications  
454 other than m4C are less frequent in these regions (Supplementary Figure S5).

### 3.3 Methylated positions (m6A) and methylated regions (m4C) of interest

456 As mentioned above, the vast majority of adenosines present in GATC motifs were  
detected methylated in all sequenced strains (99.7%). Moreover, these methylated  
bases had consistently high methylation fractions, with almost all GATC adenosines  
460 being close to full methylation. However, we identified 907 GATC adenosines not fully  
methylated (“low-meth m6A”) using our filtering criteria, i.e. 1.2% of adenosines in  
462 GATC, which were located in 458 distinct GATC palindromes. Based on the genomic  
distribution of all GATC motifs, these low-meth m6A were more frequent than expected  
464 in promoter regions ( $\chi^2 = 530.49$ ,  $df = 1$ ,  $p < 0.001$ ) and rarer than expected in  
operons ( $\chi^2 = 1674.5$ ,  $df = 1$ ,  $p < 0.001$ ).

466 The detection of m4C methylated regions (i.e. clusters of m4C positions investi-  
gated with the kernel density approach) yielded 167 segments distributed across the  
468 genome. The majority of those segments (75%) comprised two or three of the density

## RESULTS

## Epigenetics and adaptation

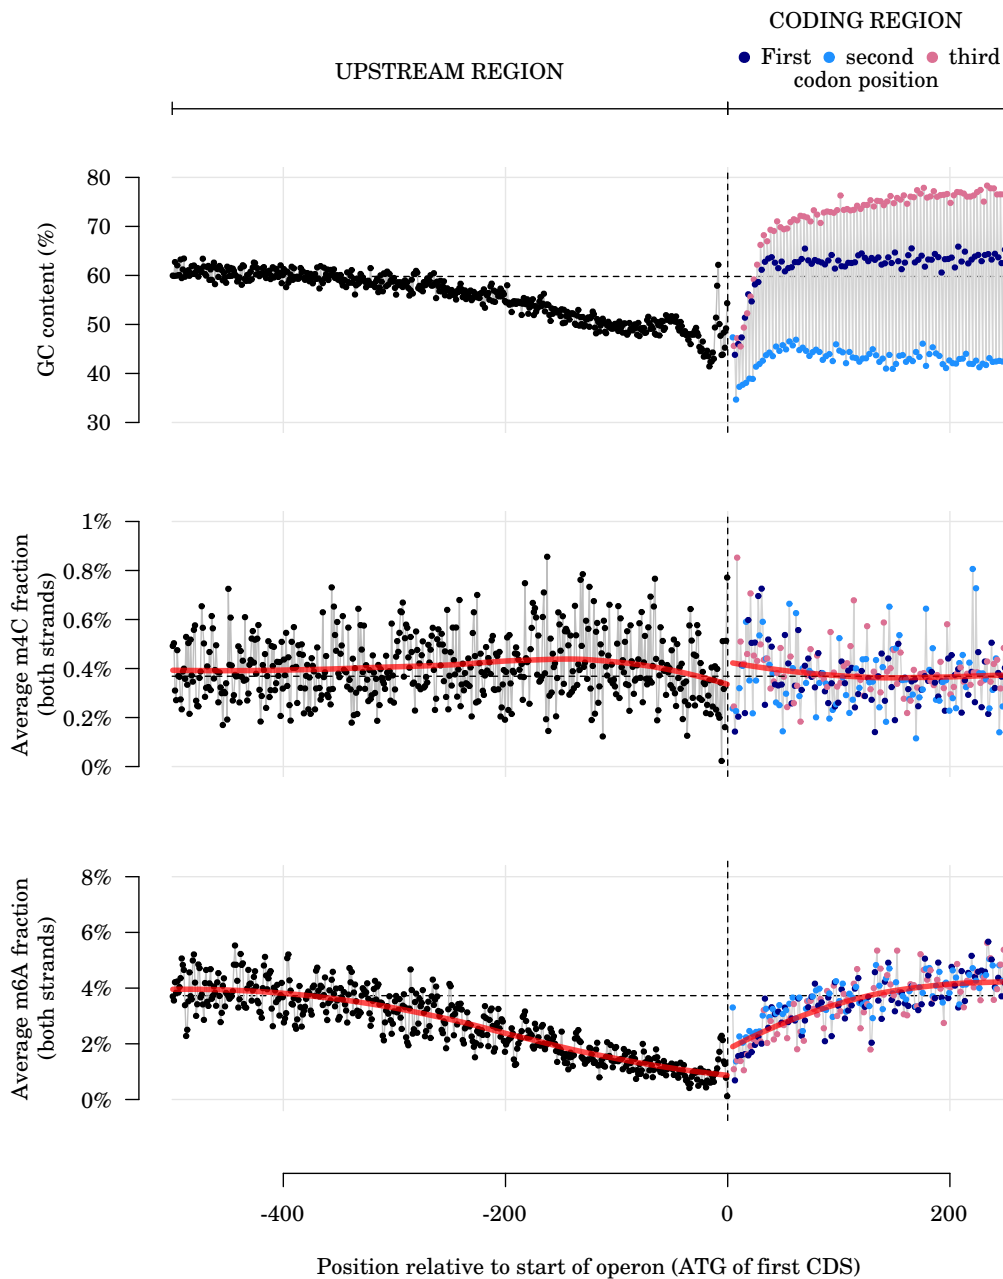

Figure 3: Profiles of nucleotide composition and average methylated fractions for m6A and m4C around the start positions of operon-leading CDS. Thick red line: LOESS regression (span = 0.75). Vertical dashed lines show the limit between upstream non-coding regions and the first codon of the leading CDS of predicted operons. Plotted values are averaged over each position relative to the leading CDS initiation codon based on operons predicted in the reference genome. Horizontal dashed lines show the genome-wide average values. Values for the three first bases on the coding sequences (usually ATG) are dropped from the plot to keep the y-scale reasonably narrow.

estimation cells, which correspond to genome stretches 79 and 118 bp long. The largest  
470 segments were 8 cell long (313 bp). About 11 % of the cytosines in those segments were  
detected as m4C in at least one sequenced strain, compared to a genome-wide aver-  
472 age of 2.5 %. Those m4C segments were not evenly distributed between operon and  
promoter regions, even when taking into account GC-content genomic distribution:  
474 like low-meth m6A positions, m4C segments were more frequent than expected in pro-  
moter regions ( $\chi^2 = 16.5$ ,  $df = 1$ ,  $p < 0.001$ ) and rarer than expected in operon regions  
476 ( $\chi^2 = 390.7$ ,  $df = 1$ ,  $p < 0.001$ ).

**Association between genetic mutations and epigenetic changes.** We found  
478 tentative evidence of association between genetic mutations and m6A methylation  
changes only for haplotype *a* (which encompasses 11 mutations), and between m4C  
480 methylation changes and mutation 39 (Figure 4). In both cases, the number of epiloci  
associated with the genetic change was limited: using an uncorrected *p*-value threshold  
482 of  $p < 0.01$  for the associations which were outside the 95 % *p*-value inflation envelope  
from permuted datasets, 28 out of 907 m6A epiloci were associated with haplotype  
484 *a* and 17 out of 167 m4C epiloci were associated with mutation 39. No relationship  
between distance from the epiloci to the mutation locus and *p*-value of association was  
486 observed. All in all, this provides very little support for a genetic control of epigenetic  
changes by one or a few major loci in our dataset. Additionally, given that haplotype  
488 *a* is likely to be the result of a genetic lineage pre-existing the start of the evolution  
experiment, we adopted a conservative approach when investigating the methylation  
490 changes happening during the evolution experiment and removed all m6A epiloci as-  
sociated with haplotype *a* (uncorrected *p*-value  $< 0.01$ ) from downstream analyses.

492 **Methylation changes during experimental evolution.** We investigated the changes  
in methylation for the m6A and m4C epiloci of interest across strains by first examining  
494 the per-epiloci variability of methylated fraction along the genome, calculated as the  
standard deviation of methylated fractions observed for all sequenced strains for each

## RESULTS

## Epigenetics and adaptation

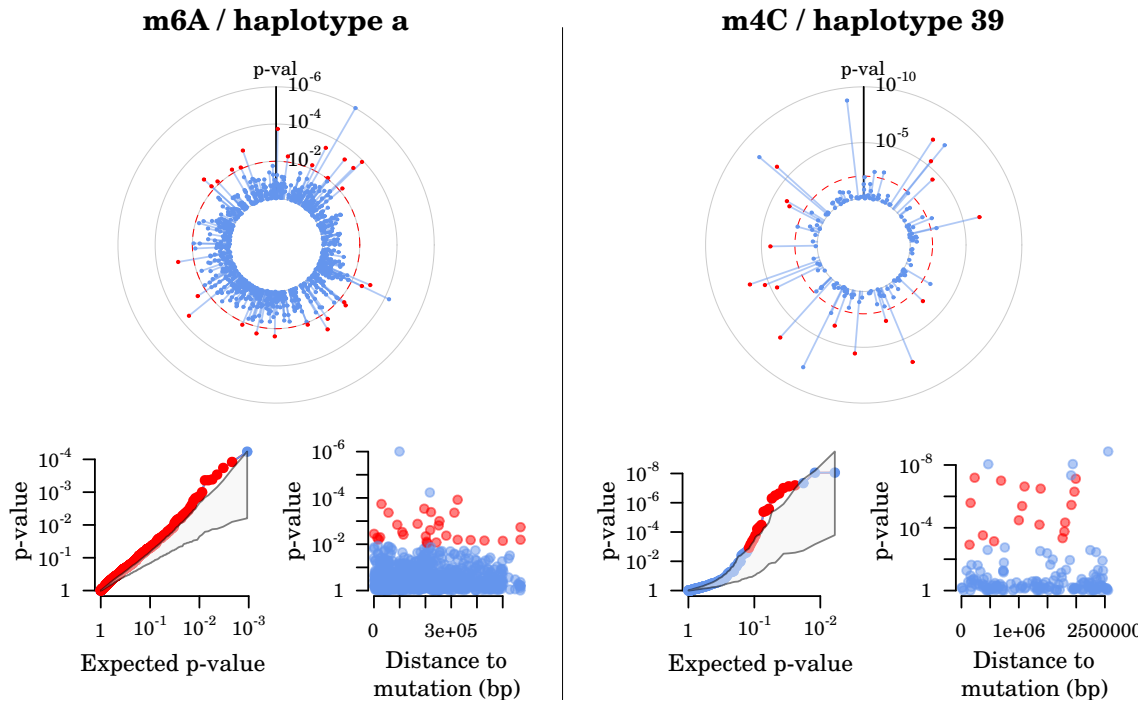

## RESULTS

## Epigenetics and adaptation

496 epiloci. For m4C, methylated fractions were more variable inside operons compared to  
outside (Wilcoxon test  $p$ -value = 0.043) but there was no difference between inside and  
498 outside promoter regions ( $p$ -value = 0.52). For m6A, methylated fractions were more  
variable inside promoter regions compared to outside (Wilcoxon test  $p$ -value < 0.001)  
500 and were less variable inside operons compared to outside ( $p$ -value < 0.001).

In order to determine if methylation changes happened during the evolution experi-  
502 ment, we investigated the methylation changes for the m6A and m4C epiloci of interest  
across strains by classifying those epiloci into low variability and high variability sets.  
504 The high variability set was further divided into loci with continuous and discontinuous  
methylation variation. This was done using a simple heuristic based on their observed  
506 methylated fraction profiles. For each epilocus, we sorted the methylated fractions  
observed in the 28 evolved strains and calculated (i) the range of methylated fractions,  
508 (ii) the largest increment between successive methylated fractions and (iii) the ratio  
between this largest increment and the methylated fraction range (Supplementary Fig-  
510 ure S7, panels A and B). We considered epiloci for which the methylated fraction range  
was less than 0.2 to be *low variability* epiloci. High variability epiloci with a methy-  
512 lation fraction range greater than 0.2 were further split into *continuous* epiloci, i.e.  
epiloci showing a relatively smooth gradient from lowest to highest methylated frac-  
514 tions and *discontinuous* epiloci, i.e. epiloci for which the largest methylated fraction  
increment was greater than 0.3 times the methylated fraction range (Supplementary  
516 Figure S7, panels C, D and E). For *discontinuous* epiloci, strains were assigned to a  
“low” or “high” epiallele based on their methylated fraction relative to the location of  
518 the largest increment. As discontinuous epiloci seemed more likely to have an effect on  
gene regulation, we used these when examining the distribution of epigenetic changes  
520 across strains and evolutionary treatment.

The procedure to identify *discontinuous* epiloci was performed separately for m4C  
522 and m6A. The chosen heuristic resulted in 43 (26%) of the 167 m4C epiloci and 256  
(28%) of the 907 m6A epiloci being assigned to this category (Supplementary Figure

## RESULTS

## Epigenetics and adaptation

---

524 S7). Six epiloci out of those 256 were found associated with haplotype *a* earlier and thus  
removed from downstream analyses. The vast majority of those epiloci had their minor  
526 epialleles present in only one strain, both for m6A and m4C (Figure 5 A,D). When  
examining only epiloci with minor epialleles shared by at least two strains, there was  
528 no clear association between the occurrence of epigenetic changes and the evolutionary  
treatment (Figure 5 B,E and C,F).



RESULTS

Epigenetics and adaptation

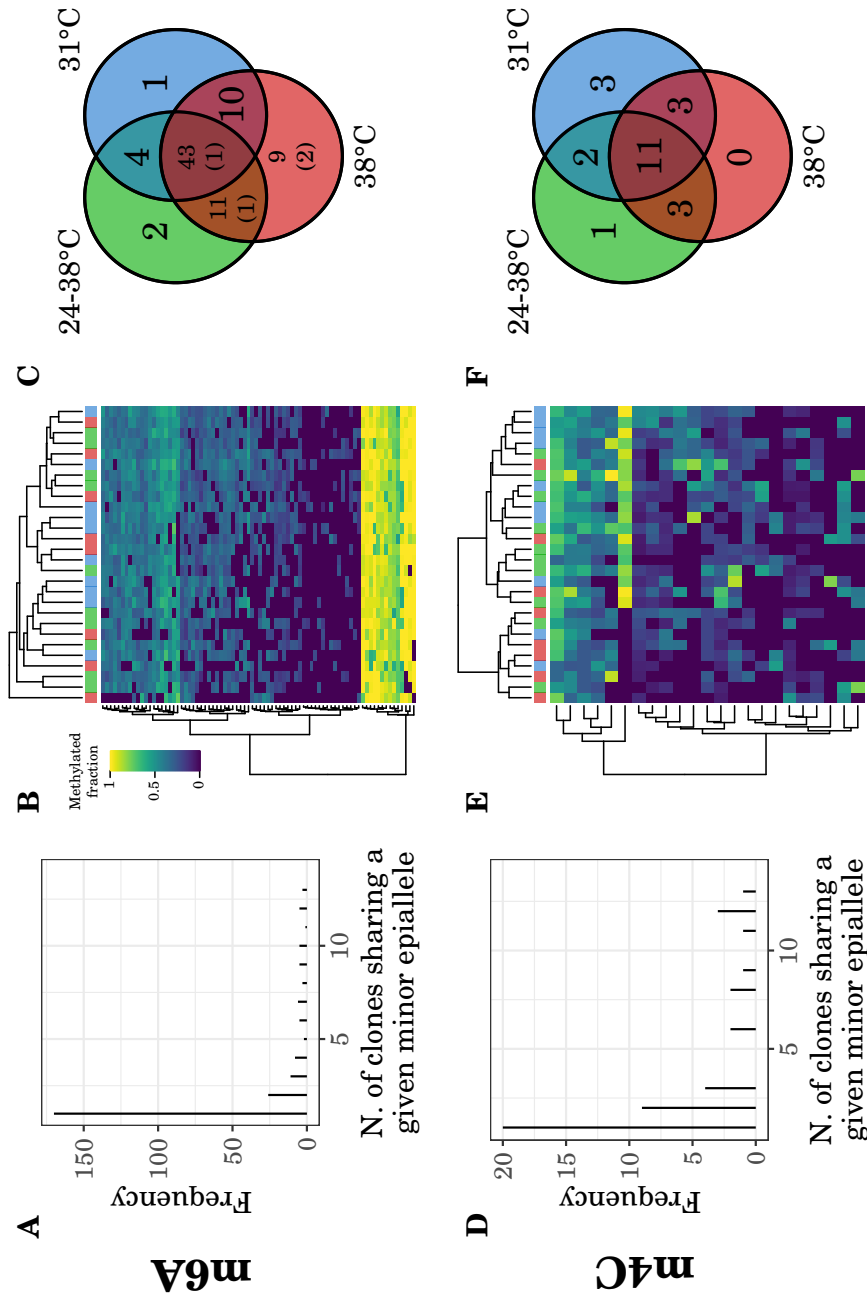

Figure 5: Frequency and distribution of epigenetic changes across strains. Only epialleles assigned to the *discontinuous* category are presented (see Supplementary Figure S7). A, D: Distributions of shared epigenetic changes across strains. B, E: Heatmap of the methylated fraction for epialleles shown in A, D with minor alleles in at least two strains. Strains are color-coded by evolutionary treatment. C, F: Venn diagrams showing shared minor alleles for epialleles from B, E across evolutionary treatments. For m6A, numbers in parentheses indicate the number of epialleles which were associated with phenotypic traits in Bruneaux et al. (2019).

### 530 3.4 Decomposition of phenotypic variance

To evaluate how much genetic and epigenetic changes contributed to phenotypic vari-  
532 ation, we used a random effect model incorporating similarity matrices based on geno-  
types and epigenotypes. Our approach is conceptually equivalent to estimating a ge-  
534 netic heritability and an epigenetic heritability for each phenotypic trait. Comparing  
the phenotypic variance decomposition between a purely random-effect model (i.e. in-  
536 cluding haplotype *a* in the genetic similarity matrix, Figure 6) and a model including  
haplotype *a* as a fixed effect (Supplementary Figure S8) enabled us to estimate the  
538 overall effect of genetic variants, regardless of their origin, and the effect of genetic vari-  
ants appeared during the evolution experiment, respectively (assuming that haplotype  
540 *a* was a genetic lineage present at the beginning of the evolution experiment).

When all genetic loci were included into the genetic similarity matrix (including  
542 haplotype *a*), estimates of genetic and epigenetic variances varied between traits, but  
some general patterns can be derived from the posterior distributions of  $r_{GEN}^2$ ,  $r_{EPI}^2$   
544 and  $r_{RES}^2$  (Figure 6A): for virulence and phage activation traits (first two columns in  
Figure 6A), the largest component was the genetic variance, followed by the epigenetic  
546 variance which tended to be larger than the residual variance. For temperature-related  
traits and co-selected traits (last two columns in Figure 6A), the uncertainty was gen-  
548 erally larger, with a possibly equal contribution of genetic and epigenetic variances  
and again a smaller contribution of residual variance. When including a fixed effect of  
550 haplotype *a*, the remaining genetic heritability was decreased in favor of an increased  
epigenetic heritability for virulence and phage activation traits, but the previous pat-  
552 terns remained mostly unchanged for other traits (Supplementary Figure S8, panel  
A)

554 To estimate the joint and disjoint proportions of phenotypic variance explained  
by evolutionary treatment, genetics and epigenetics, we used the total proportions  
556 of phenotypic variance explained by all possible combinations of the corresponding  
similarity matrices in order to calculate point estimates for each of the cells in the Venn

## RESULTS

## Epigenetics and adaptation

558 diagrams presented in Figure 6B. Importantly, those estimates did not carry over the  
uncertainty in proportions of explained variance from the MCMC posteriors, which  
560 are usually large in our models. Caution must thus be exercised when interpreting  
those estimates, and here we only examine the largest numerical differences between  
562 those values. When haplotype *a* was included in the genetic similarity matrix, the  
largest variance component for most traits was the joint contribution of genetics and  
564 epigenetics which often accounted for more than half of the phenotypic variance. This  
joint contribution of genetics and epigenetics was itself split into a large fraction (often  
566 more than half) overlapping with the treatment variance. The disjoint contributions of  
treatment, genetics and epigenetics were much smaller and hard to estimate reliably.  
568 This large overlap between the genetic and epigenetic contributions to the phenotypic  
variances is consistent with the relatively large correlations between genetic, epigenetic  
570 and phenotypic distances estimated using Mantel's R (Supplementary Figures S12 and  
S13). When haplotype *a* was included as a fixed effect, the joint contribution of genetics  
572 and epigenetics in variance decomposition decreased for virulence and phage activation  
traits but remained important, while other phenotypic variance decomposition patterns  
574 remained mostly unchanged overall (Supplementary Figure S8, panel B)

Additionally, to characterize the specificity of the evolutionary trajectories among  
576 evolutionary treatments, we applied the same variance decomposition approach as  
shown in Figure 6 using one pair of treatments at a time instead of the full dataset  
578 (Supplementary Figure S9). The overall patterns in variance decomposition for growth  
rates and yields are very similar whether the full dataset or any pair of treatments  
580 is used. However, for virulence and phage activation traits, the genetic heritability  
seems to play a smaller role when comparing 31 °C and 24–38°C treatments than when  
582 comparing any of those treatments with the 38 °C treatment (Supplementary Figure  
S9, A panels). The decrease of the genetic component is also observed in the Venn  
584 diagram decomposition (Supplementary Figure S9, B panels), most markedly through  
a decrease in the joint contribution of genetics, epigenetics and evolutionary treatment.

586 Overall, these results suggest a larger role of genetics in determining the differentiation  
of virulence and phage activation traits between the 38 °C and the other treatments,  
588 compared to between 31 °C and 24–38°C treatments. When comparing those results  
with results obtained using haplotype *a* as a fixed effect, the relative importance of  
590 genetics in comparisons of the 38 °C treatment with the other treatments tended to  
decrease, supporting the hypothesis that part of the differentiation of the 38 °C treat-  
592 ment compared to the others is due to the selection of the alternate lineage containing  
haplotype *a* (Supplementary Figure S10).

594 Finally, we also performed phenotypic variance decomposition for the full dataset  
after taking into account the fixed effect of the genetic locus 39 which was found  
596 to be potentially associated with epigenetic changes for m4C. Removing the fixed  
effect of locus 39 had overall very little effect on phenotypic variance decomposition  
598 (Supplementary Figure S11), which is consistent with the fact that it was associated  
with m4C changes but not m6A changes.

RESULTS

Epigenetics and adaptation

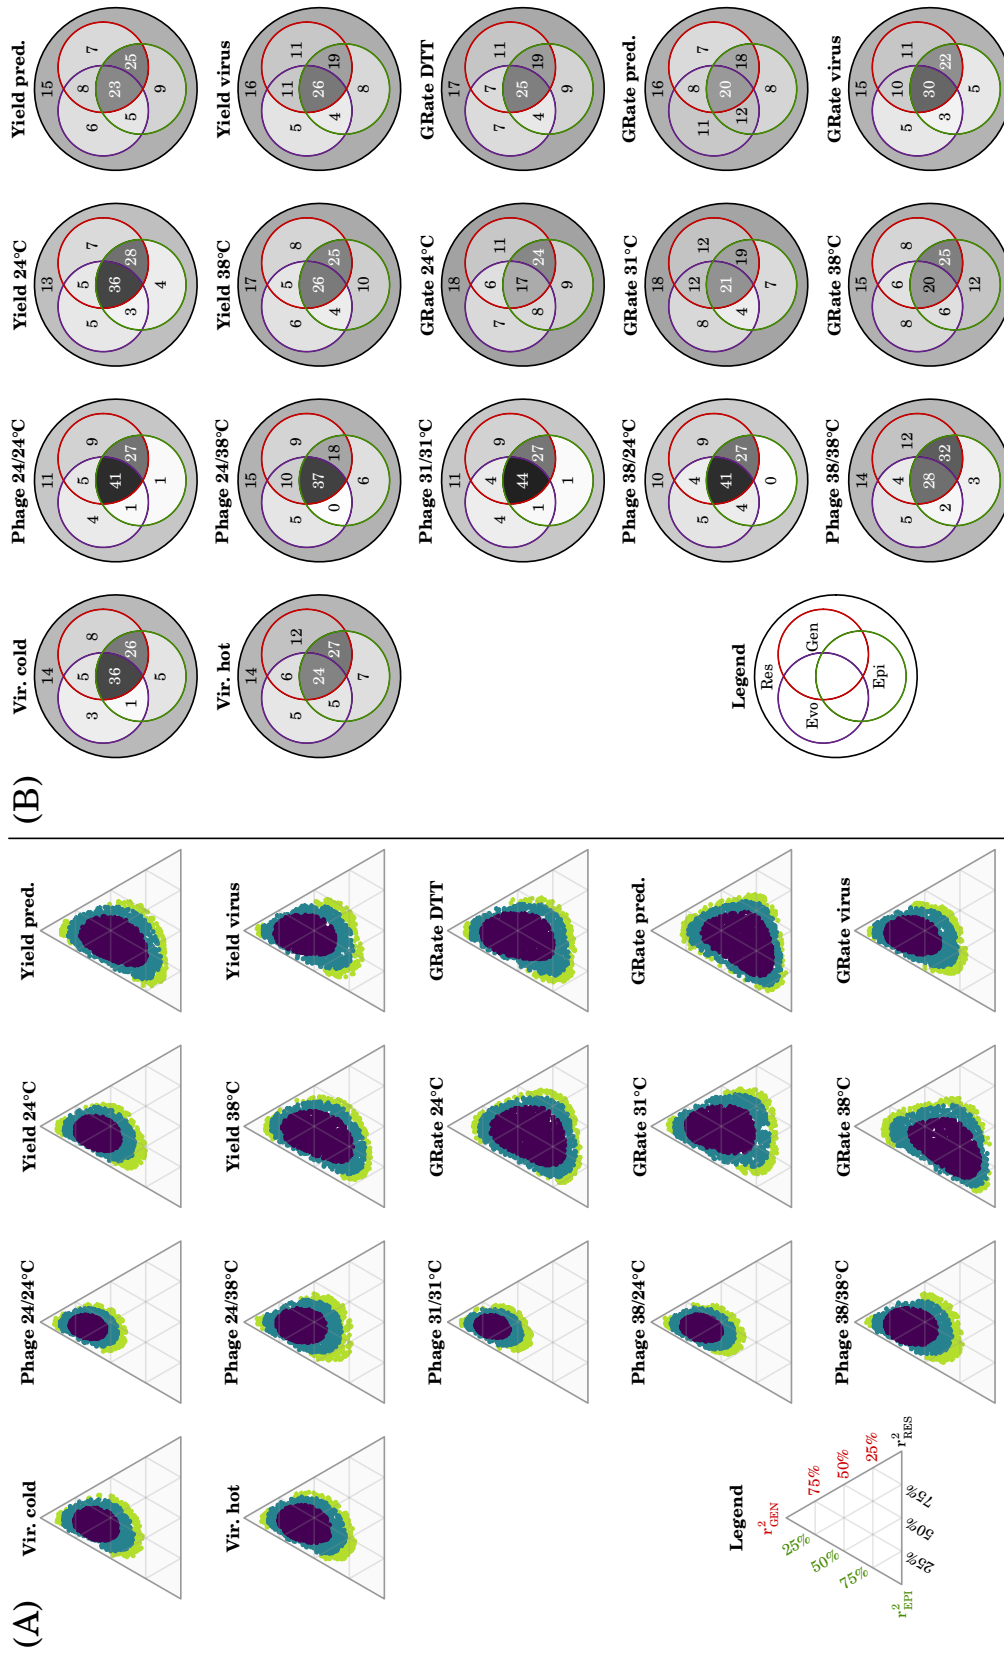

Figure 6: Variance decomposition for each phenotypic trait. (A), 50%, 80% and 90% credible surfaces for the estimates of the genetic, epigenetic and residuals components in total phenotypic variance. (B), point estimates for joint and disjoint variance components described by evolutionary treatment, genetics and epigenetics (in % of total phenotypic variance). Vir. cold and Vir. hot, strain virulence in two temperatures; Phage 24/24 °C and similar, phage activation under five assay temperature treatments; Yield and Growth Rate at different assay temperatures and under novel conditions (in presence of predator, virus and DTT).

## 600 4 Discussion

We have shown that substantial variation in methylation arose during experimental  
602 evolution in *Serratia marcescens*. The genomic distribution of methylated positions  
suggested a role of modified adenosines (m6A) in the regulation of gene expression, but  
604 not a role of modified cytosines (m4C). Phenotypic variance was in large part (about  
40-50% or more) described by a shared contribution of genetics and epigenetics, while  
606 evolutionary treatment explained about half of this shared variance. Despite this strong  
shared component between genetics and epigenetics, only little evidence of genetic  
608 control of epigenetic changes was found. Both potentially environmentally-induced  
variation (changes shared across evolved strains) and spontaneous epigenetic variation  
610 (strain-specific changes) were observed in our data. Spontaneous epigenetic variation  
included variation that was likely neutral along with some potentially adaptive changes.

612 The function of m6A was suggested by the genomic distribution of the corresponding  
GATC methylation motif, which pointed to different evolutionary constraints on m6A  
614 methylation between promoters and gene bodies: the GATC motif was less frequent in  
promoter regions and more frequent in gene bodies than expected by chance. [Oshima](#)  
616 [et al. \(2002\)](#) suggested that GATC in upstream regions could modulate gene expression  
by interacting with some regulatory proteins. However, [Riva et al. \(2004\)](#) argued  
618 that the regulation of expression was due to clusters of GATC situated inside the  
coding regions, which would affect DNA stability and thus expression based on their  
620 methylation status. In the case of *S. marcescens*, the usage bias against GATC in  
promoters supports a possible selection pressure to preserve transcription regulation in  
622 those regions from disturbance due to m6A.

Epigenetic changes did not appear to be under genetic control, as only a small  
624 proportion of the methylation variation was associated with genetic mutations. While  
our statistical power to detect association is limited with our data since there is no  
626 segregation among the bacterial clones, extensive genetic control would require assum-  
ing that each genetic mutation controls multiple different epigenetic changes in order

628 for genetic mutations to explain the observed epigenetic variation. In the cases where  
we observed an association between a mutation and epigenetic changes, a single muta-  
630 tion or haplotype was indeed tentatively associated with multiple epigenetic changes.  
Moreover, there was no relationship between distance to the mutation and the epige-  
632 netic changes, indicating that genetic control over long distance is plausible, mediated  
perhaps by indirect effects of the mutation. However, considering that we cannot dis-  
634 tinguish between a mutation inducing a methylation change and a methylation change  
hitchhiking with an adaptive genetic mutation, it does not seem plausible that even  
636 a majority of the observed methylation changes were induced by genetic mutations.  
Furthermore, in the case of m6A, association was only observed with haplotype *a* and  
638 could be therefore be due to the shared history of those epiloci with haplotype *a* prior  
to the initiation of the evolution experiment, if we assume that haplotype *a* was part  
640 of some unexpected standing genetic variation in the ancestor culture at the time of  
inoculation of the replicate experimental populations. Low amount of methylation  
642 changes that seems to be under genetic control is the same observation made by [Kronholm et al. \(2017\)](#), with *Chlamydomonas*-algae. However, it is in contrast to studies  
644 of natural populations of plants, where generally most methylation changes seem to  
be under genetic control ([Dubin et al., 2015](#); [Hagmann et al., 2015](#)). Plants have high  
646 rates of spontaneous methylation change ([van der Graaf et al., 2015](#)), so it remains to  
be seen what can explain this discrepancy.

648 Epigenetic changes can be either spontaneous ([van der Graaf et al., 2015](#)) or be  
induced by the environment ([Jiang et al., 2014](#); [Wibowo et al., 2016](#)). Any epigenetic  
650 changes that occur in multiple different clones can in principle be changes that are  
induced by their common environment or spontaneous changes that were fixed by  
652 natural selection in multiple populations, thus reflecting parallel evolution. It is also  
possible that some epigenetic loci have extremely high forward and back mutations  
654 rates, so that some polymorphism is always present. We could classify epiloci of interest  
in our dataset into three main categories based on their methylated fraction profiles: *low*



656 *variability* epiloci, *continuous* epiloci, and *discontinuous* epiloci. Both *continuous* and  
658 *discontinuous* epiloci can potentially explain phenotypic diversity, with the *continuous*  
660 epiloci possibly having higher rates of change and acting as control knobs of gene  
662 regulation at the population level and the *discontinuous* having slower rate of change  
664 and acting as gene regulatory switches. When considering the *discontinuous* epiloci,  
666 and after discarding any epiloci which might be associated with haplotype *a*, we only  
668 observed very few changes that were only shared by clones coming from a particular  
670 temperature, but instead the majority of shared methylation changes were shared by  
672 some clones from all three treatments. This suggests that either these changes reflect  
674 plastic changes in response to the laboratory environment but not to the temperature  
676 treatment itself, or that these loci have high rates of change, which could possibly  
678 reflect some sort of epigenetic bet-hedging mechanism. Lastly, the majority of observed  
680 epigenetic changes for both m6A and m4C occurred in only one or two clones. The  
682 most likely explanation is that these were spontaneous methylation changes. Due to the  
684 nature of our experiment we cannot investigate whether these rare changes somehow  
686 affect the phenotype or are neutral.

672 Our main objective was to determine the relative contributions of genetics and epi-  
674 genetics to adaptation in rapidly changing environments, and to what extent those  
676 contributions are independent from each other. The decomposition of phenotypic vari-  
678 ance showed that residual variance unexplained by either genetics or epigenetics was  
680 generally small, and that the shared contribution of genetic and epigenetic variances  
682 was generally large for all traits considered. Evolutionary treatment contributed to  
684 about half of this shared genetic or epigenetic variance suggesting that, even though  
686 treatment had an important effect on evolutionary trajectories during the experimental  
688 evolution, contingency was also an important factor. When taking into account the  
690 fixed effect of haplotype *a* on phenotypes, and thus controlling for the effect of potential  
692 standing genetic variation at the start of the evolution experiment, the joint contribu-  
694 tion of genetics and epigenetics to phenotypic variance was decreased but the shared



684 contribution of genetics, epigenetics and evolutionary treatment to phenotypic variance  
remained large. This suggests that some of the epigenetic contribution overlaps with  
686 the genetic one without this being due to an indirect effect of genetics on phenotype  
through a genetic control of epigenetic modifications or to a shared history of m6A  
688 epiloci associated with haplotype *a* prior to the initiation of the evolution experiment.

Finally, we can interpret our results in the light of the three evolutionary treatments  
690 used in the initial experiment: 31 °C, 38 °C and 24–38°C. While we did not find  
any evidence of more frequent epigenetic changes in any particular treatments, the  
692 38 °C treatment was the only treatment in which the haplotype *a*, which consists of 11  
distinct loci, was found (in 5 out of 8 strains). The haplotype *a* was also found in the  
694 reference strain from which the ancestor used for the evolution experiment was derived.  
The probability of 11 mutations arising independently and in succession in several  
696 strains in our dataset is quite low given the duration of the evolution experiment. This  
haplotype thus suggests that the ancestor culture used to initiate all the populations of  
698 the experiment might have exhibited some genetic diversity in relation with haplotype  
*a*, possibly due to cell aggregation occurring during the preparation of the ancestor  
700 clone. No sign of this diversity is observed in the sequenced strains from 31 °C and  
24–38°C, indicating that it was driven to low frequencies or extinction in 31 °C and  
702 24–38°C conditions while the 38 °C environment allowed for more diverse evolutionary  
trajectories. The fact that the 38 °C environment is genetically different from the other  
704 two is also apparent from the phenotypic variance decompositions performed on pairs of  
treatments: the genetic heritability is lower when considering the 31 °C/24–38°C pair.  
706 Overall, those results suggests that evolving at lower average temperature imposed  
stronger selective constraints on the genetic variants in our experimental organism  
708 while higher temperature allowed for more diverse genetic trajectories, and conversely  
that epigenetics were more important for differentiation between the constant and  
710 fluctuating conditions at the same average temperature.

Epigenetic changes between the evolved strains were moderate at best. However, it

712 is important to note that our experimental design and protocol which included growing  
the evolved clones in common conditions for a few generations before DNA extraction  
714 for sequencing precludes detecting rapidly reset epigenetic changes.

In conclusion, we have shown that substantial epigenetic variation in adenosine  
716 methylation exists in *Serratia marcescens* and that some of this variation is likely to  
have functional consequences and to be adaptive. The role of epigenetic changes may be  
718 mediation of initial plastic responses, or just generation of variation as a bet-hedging  
strategy. Furthermore, at least part of the variation in methylation is likely to be  
720 neutral. Genetic variants from unexpected pre-existing standing genetic variation in  
our experiment seem to be responsible for the majority of divergent adaptation between  
722 the 38 °C treatment and the others, but the large shared contribution of genetic and  
epigenetic variation to phenotype even when taking into account haplotype *a* suggests  
724 that genetics and epigenetics both exert a strong control on bacterial traits.

**Acknowledgements.** We acknowledge the Academy of Finland (Project 278751)  
726 and the Centre of Excellence in Biological Interactions for funding and facilities, and  
CSC-IT center for Science for computational resources.

728 **References**

- 730 Adam, M., Murali, B., Glenn, N. O., and Potter, S. S. Epigenetic inheritance based  
evolution of antibiotic resistance in bacteria. *BMC Evolutionary Biology*, 8(1):52,  
Feb 2008. ISSN 1471-2148. doi: 10.1186/1471-2148-8-52.
- 732 Angiuoli, S. V. and Salzberg, S. L. Mugsy: fast multiple alignment of closely related  
whole genomes. *Bioinformatics*, 27(3):334–342, February 2011. ISSN 1367-4803,  
734 1460-2059. doi: 10.1093/bioinformatics/btq665.
- Atack, J. M., Srikhanta, Y. N., Fox, K. L., Jurcisek, J. A., Brockman, K. L., Clark,  
736 T. A., Boitano, M., Power, P. M., Jen, F. E.-C., McEwan, A. G., Grimmond, S. M.,  
Smith, A. L., Barenkamp, S. J., Korch, J., Bakaletz, L. O., and Jennings, M. P. A  
738 biphasic epigenetic switch controls immunoevasion, virulence and niche adaptation  
in non-typeable *Haemophilus influenzae*. *Nat Commun*, 6:7828, July 2015.
- 740 Becker, C., Hagmann, J., Müller, J., Koenig, D., Stegle, O., Borgwardt, K., and Weigel,  
D. Spontaneous epigenetic variation in the *Arabidopsis thaliana* methylome. *Nature*,  
742 480:245–249, 2011.
- Bird, A. DNA methylation patterns and epigenetic memory. *Genes & Development*,  
744 16(1):6–21, January 2002. ISSN 0890-9369. doi: 10.1101/gad.947102.
- Blow, M. J., Clark, T. A., Daum, C. G., Deutschbauer, A. M., Fomenkov, A., Fries,  
746 R., Froula, J., Kang, D. D., Malmstrom, R. R., Morgan, R. D., Posfai, J., Singh,  
K., Visel, A., Wetmore, K., Zhao, Z., Rubin, E. M., Korch, J., Pennacchio, L. A.,  
748 and Roberts, R. J. The Epigenomic Landscape of Prokaryotes. *PLOS Genet*, 12(2):  
e1005854, February 2016. ISSN 1553-7404. doi: 10.1371/journal.pgen.1005854.
- 750 Braaten, B. A., Nou, X., Kaltenbach, L. S., and Low, D. A. Methylation patterns  
in pap regulatory DNA control pyelonephritis-associated pili phase variation in *E.*  
752 *coli*. *Cell*, 76(3):577–588, February 1994. ISSN 0092-8674, 1097-4172. doi: 10.1016/  
0092-8674(94)90120-1.
- 754 Bruneaux, M., Ashrafi, R., Kronholm, I., Örmälä Odegrip, A.-M., Galarza, J. A.,  
Chen, Z., Mruthyunjay, K. S., and Ketola, T. Environmentally triggered evolution-  
756 ary cascade across trophic levels in an experimental phage-bacteria-insect system.  
*submitted to BioRxiv*, 2019.
- 758 Camacho, C., Coulouris, G., Avagyan, V., Ma, N., Papadopoulos, J., Bealer, K., and  
Madden, T. L. BLAST+: architecture and applications. *BMC Bioinformatics*, 10  
760 (1):421, December 2009. ISSN 1471-2105. doi: 10.1186/1471-2105-10-421.
- Casadesús, J. and Low, D. Epigenetic Gene Regulation in the Bacterial World. *Mi-  
762 crobiology and Molecular Biology Reviews*, 70(3):830–856, September 2006. ISSN  
1092-2172, 1098-5557. doi: 10.1128/MMBR.00016-06.
- 764 Casselli, T., Tourand, Y., Scheidegger, A., Arnold, W. K., Proulx, A., Stevenson, B.,  
and Brissette, C. A. DNA Methylation by Restriction Modification Systems Affects  
766 the Global Transcriptome Profile in *Borrelia burgdorferi*. *Journal of Bacteriology*,

REFERENCES

Epigenetics and adaptation

- 200(24):e00395–18, December 2018. ISSN 0021-9193, 1098-5530. doi: 10.1128/JB.  
768 00395-18.
- Charlesworth, D., Barton, N. H., and Charlesworth, B. The sources of adaptive varia-  
770 tion. *Proceedings of the Royal Society of London B: Biological Sciences*, 284(1855),  
2017. ISSN 0962-8452. doi: 10.1098/rspb.2016.2864.
- 772 Clark, T. A., Lu, X., Luong, K., Dai, Q., Boitano, M., Turner, S. W., He, C., and  
Korlach, J. Enhanced 5-methylcytosine detection in single-molecule, real-time se-  
774 quencing via Tet1 oxidation. *BMC Biology*, 11(1):4, January 2013. ISSN 1741-7007.  
doi: 10.1186/1741-7007-11-4.
- 776 Danchin, E., Charmantier, A., Champagne, F. A., Mesoudi, A., Pujol, B., and  
Blanchet, S. Beyond DNA: integrating inclusive inheritance into an extended theory  
778 of evolution. *Nat Rev Genet*, 12(7):475–486, July 2011. ISSN 1471-0056.
- Day, T. and Bonduriansky, R. A unified approach to evolutionary consequences of  
780 genetic and nongenetic inheritance. *American Naturalist*, 178:E18–E36, 2011.
- Dubin, M. J., Zhang, P., Meng, D., Remigereau, M.-S., Osborne, E. J., Paolo Casale,  
782 F., Drewe, P., Kahles, A., Jean, G., Vilhjálmsson, B., Jagoda, J., Irez, S., Voronin,  
V., Song, Q., Long, Q., Rättsch, G., Stegle, O., Clark, R. M., and Nordborg, M. Dna  
784 methylation in arabidopsis has a genetic basis and shows evidence of local adaptation.  
*eLife*, 4:e05255, 2015. doi: 10.7554/eLife.05255.
- 786 Flyg, C., Kenne, K., and Boman, H. G. Insect pathogenic properties of *Serratia*  
*marcescens*: phage-resistant mutants with a decreased resistance to *Cecropia* immu-  
788 nity and a decreased virulence to *Drosophila*. *Journal of General Microbiology*, 120  
(1):173–181, September 1980. ISSN 0022-1287. doi: 10.1099/00221287-120-1-173.
- 790 Gao, F., Luo, H., and Zhang, C.-T. DoriC 5.0: an updated database of oriC regions  
in both bacterial and archaeal genomes. *Nucleic Acids Research*, 41(D1):D90–D93,  
792 October 2012. ISSN 0305-1048, 1362-4962. doi: 10.1093/nar/gks990.
- Grimont, P. A. D. and Grimont, F. The Genus *Serratia*. *Annual Review of Microbiology*,  
794 32(1):221–248, 1978. doi: 10.1146/annurev.mi.32.100178.001253.
- Hadfield, J. D. Mcmc methods for multi-response generalized linear mixed models:  
796 The MCMCglmm R package. *Journal of Statistical Software*, 33(2):1–22, 2010.
- Hagmann, J., Becker, C., Müller, J., Stegle, O., Meyer, R. C., Wang, G., Schneeberger,  
798 K., Fitz, J., Altmann, T., Bergelson, J., Borgwardt, K., and Weigel, D. Century-scale  
Methylome Stability in a Recently Diverged *Arabidopsis thaliana* Lineage. *PLoS*  
800 *Genetics*, 11(1):e1004920, January 2015. ISSN 1553-7404. doi: 10.1371/journal.  
pgen.1004920.
- 802 Herman, J. J. and Sultan, S. E. DNA methylation mediates genetic variation for  
adaptive transgenerational plasticity. *Proceedings of the Royal Society of London B:*  
804 *Biological Sciences*, 283(1838):20160988, 2016. ISSN 0962-8452. doi: 10.1098/rspb.  
2016.0988.

REFERENCES

Epigenetics and adaptation

- 806 Iyer, L. M., Zhang, D., and Aravind, L. Adenine methylation in eukaryotes: Appre-  
807 hending the complex evolutionary history and functional potential of an epigenetic  
808 modification. *BioEssays*, 38(1):27–40, 2016. doi: 10.1002/bies.201500104.
- Jablonka, E. and Raz, G. Transgenerational epigenetic inheritance: prevalence, mech-  
810 anisms, and implications for the study of heredity and evolution. *Quarterly Review  
of Biology*, 84:131–176, 2009.
- 812 Jiang, C., Mithani, A., Belfield, E. J., Mott, R., Hurst, L. D., and Harberd, N. P. En-  
813 vironmentally responsive genome-wide accumulation of de novo arabidopsis thaliana  
814 mutations and epimutations. *Genome Research*, 24(11):1821–1829, 2014. doi:  
10.1101/gr.177659.114.
- 816 Ketola, T., Mikonranta, L., Zhang, J., Saarinen, K., Örmälä, A.-M., Friman, V.-P.,  
817 Mappes, J., and Laakso, J. Fluctuating temperature leads to evolution of thermal  
818 generalism and preadaptation to novel environments. *Evolution*, 67:2936–2944, 2013.
- Klironomos, F., Berg, J., and Collins, S. How epigenetic mutations can affect genetic  
820 evolution: Model and mechanism. *BioEssays*, 35:571–578, 2013.
- Kronholm, I. Adaptive evolution and epigenetics. In Tollefsbol, T. O., editor, *Handbook  
822 of epigenetics: the new molecular and medical genetics*, pages 427–438. Academic  
Press, London, 2nd edition, 2017. ISBN 978-0-12-805388-1.
- 824 Kronholm, I. and Collins, S. Epigenetic mutations can both help and hinder adaptive  
825 evolution. *Molecular Ecology*, 25:1856–1868, 2016. ISSN 1365-294X. doi: 10.1111/  
826 mec.13296.
- Kronholm, I., Bassett, A., Baulcombe, D., and Collins, S. Epigenetic and genetic  
828 contributions to adaptation in *Chlamydomonas*. *Molecular Biology and Evolution*,  
34(9):2285–2306, 2017.
- 830 Legendre, P. and Legendre, L. *Numerical ecology*. Developments in environmental  
modelling. Elsevier Science, 1998. ISBN 978-0-08-053787-0.
- 832 Legendre, P., Fortin, M.-J., and Borcard, D. Should the Mantel test be used in spatial  
833 analysis? *Methods in Ecology and Evolution*, 6(11):1239–1247, 2015. ISSN 2041-  
834 210X. doi: 10.1111/2041-210X.12425.
- Lenski, R. E., Rose, M. R., Simpson, S. C., and Tadler, S. C. Long-Term Exper-  
836 imental Evolution in *Escherichia coli*. I. Adaptation and Divergence During 2,000  
Generations. *The American Naturalist*, 138(6):1315–1341, 1991. ISSN 0003-0147.
- 838 Luna, E. and Ton, J. The epigenetic machinery controlling transgenerational systemic  
839 acquired resistance. *Plant Signaling & Behavior*, 7(6):615–618, June 2012. ISSN  
840 1559-2324.
- Ma, C., Niu, R., Huang, T., Shao, L.-W., Peng, Y., Ding, W., Wang, Y., Jia, G., He,  
842 C., Li, C.-Y., He, A., and Liu, Y. N6-methyldeoxyadenine is a transgenerational  
epigenetic signal for mitochondrial stress adaptation. *Nature Cell Biology*, 21(3):  
844 319–327, 2019. ISSN 1476-4679.

REFERENCES

Epigenetics and adaptation

- 846 Mantel, N. and Valand, R. S. A technique of nonparametric multivariate analysis. *Biometrics*, 26(3):547–558, September 1970. ISSN 0006-341X.
- 848 Oksanen, J., Blanchet, F. G., Friendly, M., Kindt, R., Legendre, P., McGlinn, D.,  
850 Minchin, P. R., O’Hara, R. B., Simpson, G. L., Solymos, P., Stevens, M. H. H.,  
Szoecs, E., and Wagner, H. *vegan: Community Ecology Package*, 2019. R package  
version 2.5-4.
- 852 Oshima, T., Wada, C., Kawagoe, Y., Ara, T., Maeda, M., Masuda, Y., Hiraga, S.,  
and Mori, H. Genome-wide analysis of deoxyadenosine methyltransferase-mediated  
854 control of gene expression in *Escherichia coli*. *Molecular Microbiology*, 45(3):673–695,  
August 2002. ISSN 0950-382X.
- 856 Pride, D. T., Meinersmann, R. J., Wassenaar, T. M., and Blaser, M. J. Evolutionary  
implications of microbial genome tetranucleotide frequency biases. *Genome Research*,  
13(2):145–158, February 2003. ISSN 1088-9051. doi: 10.1101/gr.335003.
- 858 Ratel, D., Ravanat, J.-L., Berger, F., and Wion, D. N6-methyladenine: the other  
methylated base of DNA. *Bioessays*, 28(3):309–315, March 2006. ISSN 0265-9247.  
860 doi: 10.1002/bies.20342.
- 862 Richards, C. L., Alonso, C., Becker, C., Bossdorf, O., Bucher, E., Colome-Tatche, M.,  
Durka, W., Engelhardt, J., Gaspar, B., Gogol-Doring, A., Grosse, I., van Gurp, T. P.,  
864 Heer, K., Kronholm, I., Lampei, C., Latzel, V., Mirouze, M., Opgenoorth, L., Paun,  
O., Prohaska, S., Rensing, S. A., Stadler, P., Trucchi, E., Ullrich, K., and Verhoeven,  
866 K. J. Ecological plant epigenetics: Evidence from model and non-model species, and  
the way forward. *Ecology Letters*, 20:1351–1364, 2017. doi: 10.1101/130708.
- 868 Riva, A., Delorme, M.-O., Chevalier, T., Guilhot, N., Hénaut, C., and Hénaut, A.  
The difficult interpretation of transcriptome data: the case of the GATC regulatory  
network. *Computational Biology and Chemistry*, 28(2):109–118, April 2004. ISSN  
870 1476-9271. doi: 10.1016/j.compbiolchem.2003.12.004.
- 872 Rocha, E. P., Viari, A., and Danchin, A. Oligonucleotide bias in *Bacillus subtilis*:  
general trends and taxonomic comparisons. *Nucleic Acids Research*, 26(12):2971–  
2980, June 1998. ISSN 0305-1048.
- 874 Schmitz, R. J., Schultz, M. D., Lewsey, M. G., O’Malley, R. C., Urich, M. A., Libiger,  
O., Schork, N. J., and Ecker, J. R. Transgenerational epigenetic instability is a  
876 source of novel methylation variants. *Science*, 334:369–373, 2011.
- 878 Seshasayee, A. S. N. An assessment of the role of DNA adenine methyltransferase  
on gene expression regulation in *E. coli*. *PloS One*, 2(3):e273, March 2007. ISSN  
1932-6203. doi: 10.1371/journal.pone.0000273.
- 880 Stajic, D., Perfeito, L., and Jansen, L. E. T. Epigenetic gene silencing alters the mech-  
anisms and rate of evolutionary adaptation. *Nature Ecology & Evolution*, pages –,  
882 2019. ISSN 2397-334X.



REFERENCES

Epigenetics and adaptation

- 884 Stephens, C., Reisenauer, A., Wright, R., and Shapiro, L. A cell cycle-regulated bac-  
terial DNA methyltransferase is essential for viability. *Proceedings of the National*  
886 *Academy of Sciences*, 93(3):1210–1214, February 1996. ISSN 0027-8424, 1091-6490.  
doi: 10.1073/pnas.93.3.1210.
- 888 Sánchez-Romero, M. A., Cota, I., and Casadesús, J. DNA methylation in bacteria:  
from the methyl group to the methylome. *Current Opinion in Microbiology*, 25:  
9–16, June 2015. ISSN 1369-5274. doi: 10.1016/j.mib.2015.03.004.
- 890 Taboada, B., Estrada, K., Ciria, R., and Merino, E. Operon-mapper: a web server  
for precise operon identification in bacterial and archaeal genomes. *Bioinformatics*,  
892 34(23):4118–4120, December 2018. ISSN 1367-4803. doi: 10.1093/bioinformatics/  
bty496.
- 894 Thomson, C. E., Winney, I. S., Salles, O. C., and Pujol, B. A guide to using a multiple-  
matrix animal model to disentangle genetic and nongenetic causes of phenotypic  
896 variance. *PLOS ONE*, 13(10):e0197720, October 2018. ISSN 1932-6203. doi: 10.  
1371/journal.pone.0197720.
- 898 van der Graaf, A., Wardenaar, R., Neumann, D. A., Taudt, A., Shaw, R. G., Jansen,  
R. C., Schmitz, R. J., Colomé-Tatché, M., and Johannes, F. Rate, spectrum, and  
900 evolutionary dynamics of spontaneous epimutations. *Proceedings of the National*  
*Academy of Sciences*, 112(21):6676–6681, 2015. doi: 10.1073/pnas.1424254112.
- 902 Wang, J., Reddy, B. D., and Jia, S. Rapid epigenetic adaptation to uncontrolled  
heterochromatin spreading. *eLife*, 4:e06179, mar 2015. ISSN 2050-084X. doi: 10.  
904 7554/eLife.06179.
- 906 Wibowo, A., Becker, C., Marconi, G., Durr, J., Price, J., Hagmann, J., Papareddy, R.,  
Putra, H., Kageyama, J., Becker, J., Weigel, D., and Gutierrez-Marcos, J. Hyperos-  
motic stress memory in *Arabidopsis* is mediated by distinct epigenetically labile sites  
908 in the genome and is restricted in the male germline by DNA glycosylase activity.  
*eLife*, 5:e13546, may 2016. ISSN 2050-084X. doi: 10.7554/eLife.13546.
- 910 Zheng, X., Chen, L., Xia, H., Wei, H., Lou, Q., Li, M., Li, T., and Luo, L. Transgen-  
eration epimutations induced by multi-generation drought imposition mediate rice  
912 plant’s adaptation to drought condition. *Scientific Reports*, 7:39843, January 2017.

## 5 Appendix

### 914 5.1 Supplementary tables



APPENDIX

Epigenetics and adaptation

| ID | Haplotype | Freq. | Pos. (bp) | Type  | Region     | Effect        | Overlapping or closest ( $\leq 500$ bp) gene |                                              |
|----|-----------|-------|-----------|-------|------------|---------------|----------------------------------------------|----------------------------------------------|
|    |           |       |           |       |            |               | Name                                         | Function                                     |
| 1  | f         | 1/28  | 31 753    | indel | non-coding | -             | -                                            | -                                            |
| 2  | a         | *5/28 | 40 239    | indel | non-coding | -             | -                                            | -                                            |
| 3  | d         | 1/28  | 70 546    | indel | non-coding | -             | -                                            | -                                            |
| 4  |           | 6/28  | 92 159    | indel | non-coding | -             | hypothetical protein                         | unknown                                      |
| 5  | b         | 1/28  | 108 315   | indel | non-coding | -             | PTS beta-glucoside transporter               | carbohydrate import                          |
| 6  | a         | *5/28 | 131 841   | SNP   | CDS        | non-syn.      | cellulose biosynthesis protein BcsG          | biofilm?                                     |
| 7  |           | 1/28  | 173 551   | indel | non-coding | -             | protoheme IX biogenesis protein HemY         | heme metabolism                              |
| 8  | a         | *5/28 | 328 601   | SNP   | CDS        | non-syn.      | condensation protein                         | non-ribosomal peptide synthesis              |
| 9  |           | 1/28  | 391 159   | indel | CDS        | frameshift    | RNA chaperone Hfq                            | regulation of stress transcription factors   |
| 10 | g         | 1/28  | 429 888   | indel | non-coding | -             | transcriptional regulator                    | similar to regulator of E. coli phage Mu     |
| 11 |           | 4/28  | 522 878   | indel | CDS        | frameshift    | integrase                                    | prophage DNA Integration/excision            |
| 12 | b         | 1/28  | 751 961   | indel | CDS        | frameshift    | DNA polymerase II                            | DNA elongation                               |
| 13 | b         | 1/28  | 770 532   | indel | non-coding | -             | 2-isopropylmalate synthase                   | Leucine biosynthesis                         |
| 14 |           | 1/28  | 914 534   | indel | non-coding | -             | hydroxyacylglutathione hydrolase             | lactate metabolism/response to heat          |
| 15 |           | 1/28  | 979 119   | indel | non-coding | -             | -                                            | -                                            |
| 16 | f         | 1/28  | 1 093 517 | indel | CDS        | frameshift    | competence protein ComEA                     | cell surface DNA binding                     |
| 17 |           | 1/28  | 1 185 019 | indel | CDS        | frameshift    | hypothetical protein                         | Unknown                                      |
| 18 | c         | 1/28  | 1 311 662 | indel | CDS        | no frameshift | galactokinase                                | Galactose metabolism                         |
| 19 | b         | 1/28  | 1 311 735 | SNP   | CDS        | non-syn.      | galactokinase                                | Galactose metabolism                         |
| 20 | h         | 1/28  | 1 311 996 | SNP   | CDS        | non-syn.      | galactokinase                                | Galactose metabolism                         |
| 21 | a         | *5/28 | 1 317 345 | SNP   | CDS        | syn.          | Mo-dependent transcriptional regulator       | regulation of transcription                  |
| 22 |           | 5/28  | 1 421 879 | indel | non-coding | -             | acyl carrier protein                         | Fatty acid/polyketide biosynthesis           |
| 23 | d         | 1/28  | 1 609 697 | indel | non-coding | -             | transcriptional regulator GalS               | regulation of galactose transport/catabolism |
| 24 |           | 1/28  | 1 611 529 | SNP   | CDS        | non-syn.      | galactose/galactoside ABC transporter MglA   | galactose import                             |
| 25 |           | 1/28  | 1 612 777 | indel | CDS        | no frameshift | galactose/galactoside ABC transporter MglC   | galactose import                             |
| 26 |           | 5/28  | 1 648 573 | indel | non-coding | -             | -                                            | -                                            |
| 27 | c         | 1/28  | 1 649 017 | indel | non-coding | -             | -                                            | -                                            |
| 28 |           | *4/28 | 1 649 038 | indel | non-coding | -             | -                                            | -                                            |
| 29 |           | 4/28  | 1 665 941 | indel | CDS        | frameshift    | glycosyltransferase                          | LPS biosynthesis                             |
| 30 |           | 1/28  | 1 670 147 | SNP   | CDS        | non-syn.      | glycosyltransferase                          | LPS biosynthesis                             |
| 31 |           | 2/28  | 1 670 356 | SNP   | CDS        | non-syn.      | glycosyltransferase                          | LPS biosynthesis                             |
| 32 | e         | 1/28  | 1 670 370 | SNP   | CDS        | non-syn.      | glycosyltransferase                          | LPS biosynthesis                             |

| ID | Haplotype | Freq. | Pos. (bp) | Type  | Region     | Effect     | Name                                  | Overlapping or closest ( $\leq 500$ bp) gene                 | Function                    |
|----|-----------|-------|-----------|-------|------------|------------|---------------------------------------|--------------------------------------------------------------|-----------------------------|
| 33 | <b>a</b>  | *5/28 | 1 861 227 | indel | non-coding | -          | putative transcriptional regulator    |                                                              | regulation of transcription |
| 34 |           | 1/28  | 2 144 682 | indel | non-coding | -          | hypothetical protein                  |                                                              | unknown                     |
| 35 |           | 1/28  | 2 282 483 | indel | non-coding | -          | MATE family efflux transporter        | Na <sup>+</sup> /H <sup>+</sup> driven multidrug efflux pump |                             |
| 36 | <b>h</b>  | 1/28  | 2 353 326 | indel | CDS        | frameshift | fumarase C (iron independent)         | TCA cycle                                                    |                             |
| 37 | <b>b</b>  | 1/28  | 2 384 093 | indel | CDS        | frameshift | HlyD (haemolysin secretion system)    | haemolysin/cutinase excretion                                |                             |
| 38 | <b>a</b>  | *5/28 | 2 456 338 | SNP   | CDS        | non-syn.   | peptidoglycan synthase                | peptidoglycan biosynthesis                                   |                             |
| 39 |           | 2/28  | 2 466 586 | SNP   | CDS        | non-syn.   | MmgE/PrpD family protein              | propionate metabolism/TCA cycle?                             |                             |
| 40 | <b>e</b>  | 1/28  | 2 941 884 | indel | non-coding | -          | VOC family protein                    | unknown                                                      |                             |
| 41 |           | 2/28  | 3 161 361 | SNP   | CDS        | syn.       | serine/threonine protein kinase       | regulation of cell processes                                 |                             |
| 42 | <b>e</b>  | 1/28  | 3 408 594 | indel | non-coding | -          | nucleoside diphosphate hydrolase      | regulation of cell processes                                 |                             |
| 43 | <b>a</b>  | *5/28 | 3 477 366 | SNP   | CDS        | non-syn.   | transcriptional regulator RcsB        | capsule synthesis/cell division/biofilm/motility             |                             |
| 44 |           | *0/28 | 3 600 509 | indel | non-coding | -          | phospholipid-binding lipoprotein MlaA | Outer membrane maintenance                                   |                             |
| 45 | <b>a</b>  | *5/28 | 3 607 617 | SNP   | CDS        | non-syn.   | heme exporter protein CcmB            | cytochrome c biogenesis                                      |                             |
| 46 | <b>a</b>  | *5/28 | 3 869 219 | SNP   | CDS        | syn.       | alcohol dehydrogenase                 | energy metabolism                                            |                             |
| 47 |           | 1/28  | 4 025 724 | indel | non-coding | -          | acetyl-CoA carboxylase alpha subunit  | lipid metabolism                                             |                             |
| 48 |           | 1/28  | 4 337 062 | indel | non-coding | -          | tRNA-Phe                              | translation                                                  |                             |
| 49 |           | 1/28  | 4 362 753 | indel | non-coding | -          | glycoporin                            | carbohydrate import                                          |                             |
| 50 | <b>c</b>  | 1/28  | 4 845 837 | indel | CDS        | frameshift | peptidylprolyl isomerase              | protein folding chaperone                                    |                             |
| 51 | <b>d</b>  | 1/28  | 4 872 989 | indel | CDS        | frameshift | short chain dehydrogenase             | oxidoreductase                                               |                             |
| 52 |           | 1/28  | 4 924 755 | SNP   | CDS        | non-syn.   | threonine dehydratase                 | amino acid metabolism                                        |                             |
| 53 | <b>a</b>  | *5/28 | 5 010 850 | indel | CDS        | frameshift | deacetylase                           | LPS biosynthesis                                             |                             |
| 54 | <b>a</b>  | *5/28 | 5 010 868 | SNP   | CDS        | non-syn.   | deacetylase                           | LPS biosynthesis                                             |                             |

Supplementary Table S1: Summary of the genetic variants observed in the sequenced clones. This table is taken from [Bruneaux et al. \(2019\)](#). Haplotype: letters denote groups of mutations for which alleles are associated together. Freq.: minor allele frequency among the 28 evolved clones. An asterisk denotes loci for which the reference clone carries the minor allele.

## 5.2 Supplementary figures

916

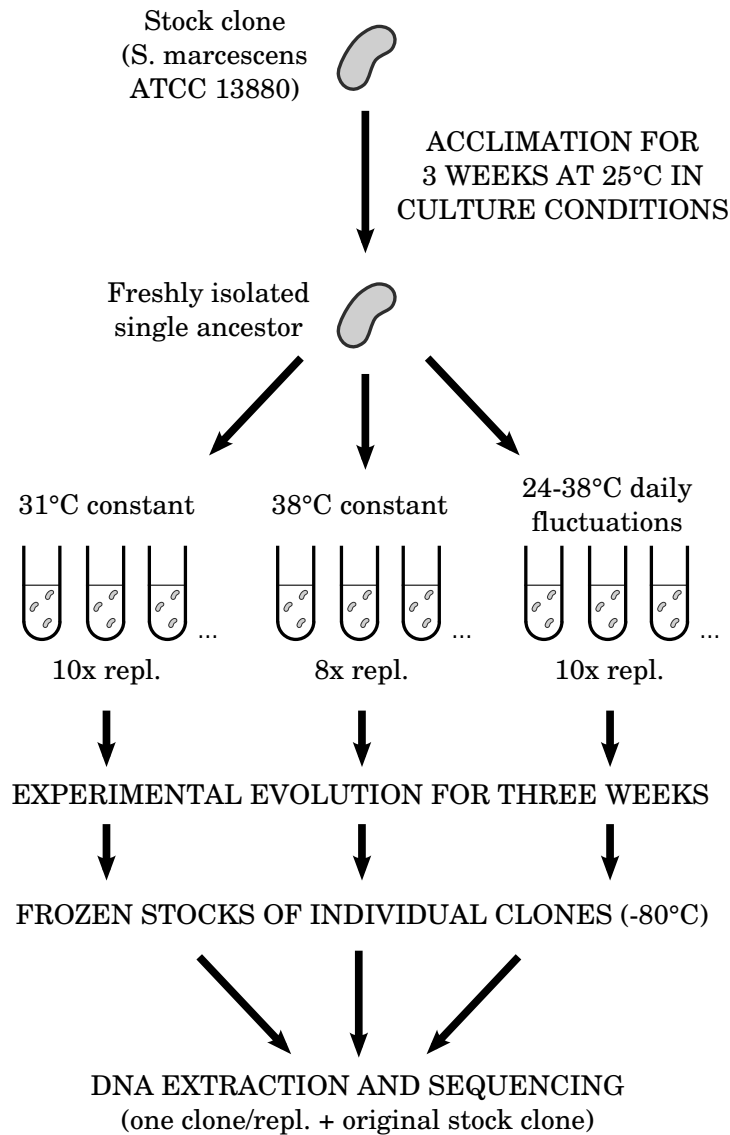

Supplementary Figure S1: Setup of the evolution experiment from which sequenced clones were isolated.

918

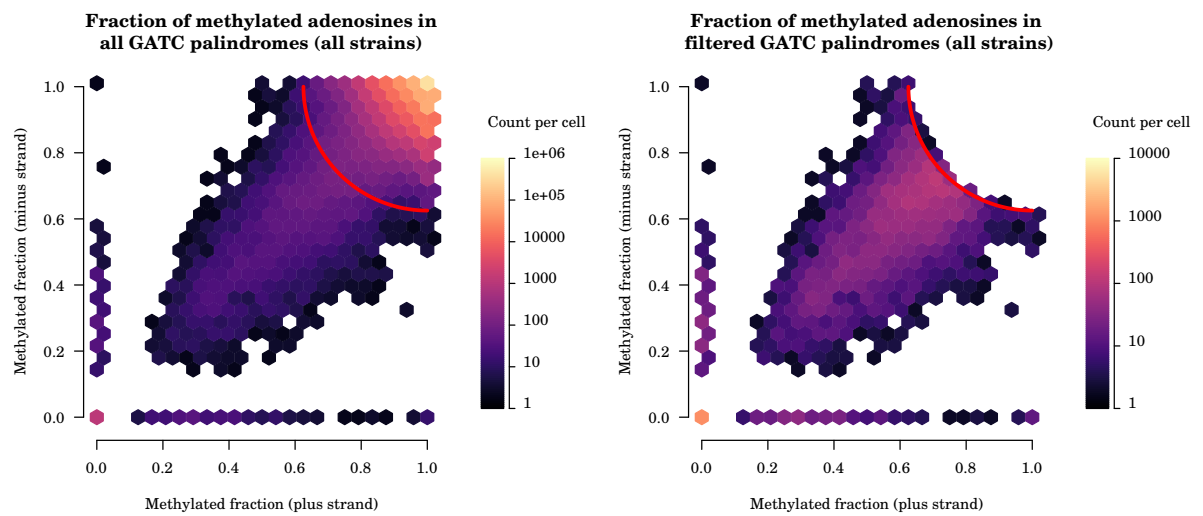

Supplementary Figure S2: Detection of partially methylated GATC loci. Distribution of methylated fractions of adenines on both DNA strands for GATC palindromes (showing data for all strains together). Left panel, all GATC palindromes shown; right panel, only GATC palindromes qualified as low methylation sites shown. The red arc in the left panel delimits the observations which are less four times the average quadratic distance to full methylation (point at (1,1)) away from full methylation. GATC palindromes are considered as low methylation sites if they lay outside this area (right panel).

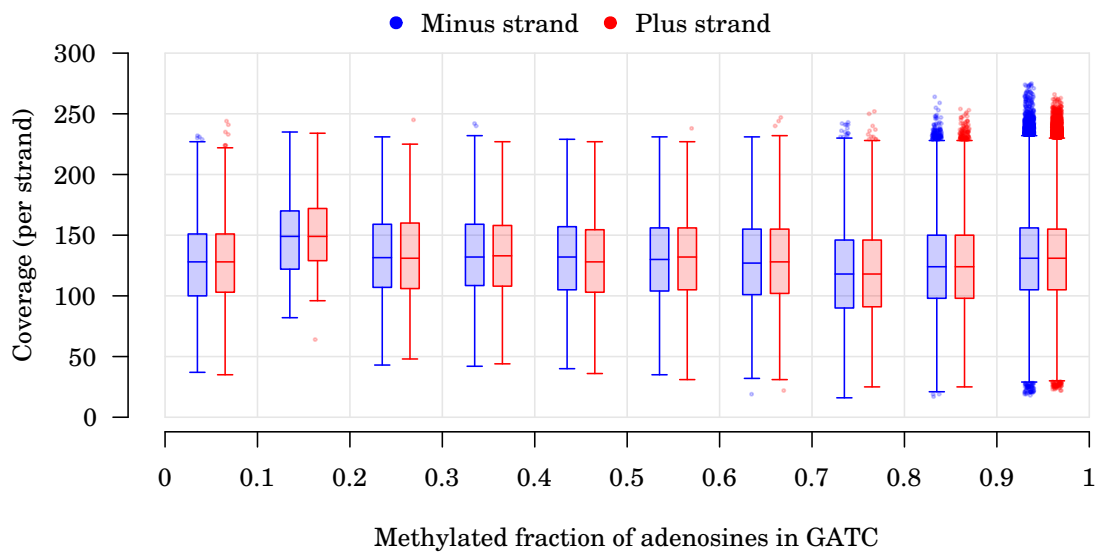

Supplementary Figure S3: Relationship between coverage and estimated fraction of methylated adenosines in GATC motifs. All adenosines present in GATC motifs, from all sequenced strains, are included. Data is binned by intervals of methylated fraction of 0.1 width, as indicated on the  $x$  axis. There is no correlation between coverage and estimated methylated fraction (Spearman's  $\rho = -0.01$ ). However, the slight increase in average coverage for the (0.1, 0.2) methylated fractions compared to the (0, 0.1) fractions suggests that at very low methylation levels (below 0.2), higher coverage is needed to estimate a methylated fraction other than 0.

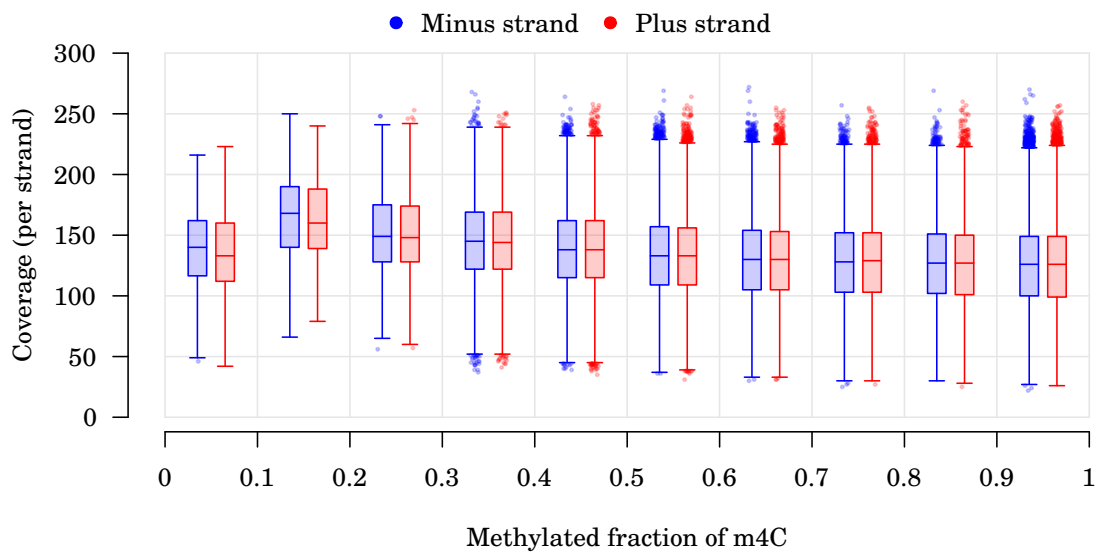

Supplementary Figure S4: Relationship between coverage and estimated fraction of methylated cytosines (m4C). All cytosines detected as m4C, from all sequenced strains, are included. Data is binned by intervals of methylated fraction of 0.1 width, as indicated on the  $x$  axis. There is a correlation between coverage and estimated methylated fraction (Spearman's  $\rho = -0.17$ ,  $p < 0.001$ ), indicating that higher coverage is needed to estimate low methylation fractions. However, 90% of detected m4C have a methylation fraction  $> 0.4$ , suggesting that the bias due to this coverage effect is likely to be small.

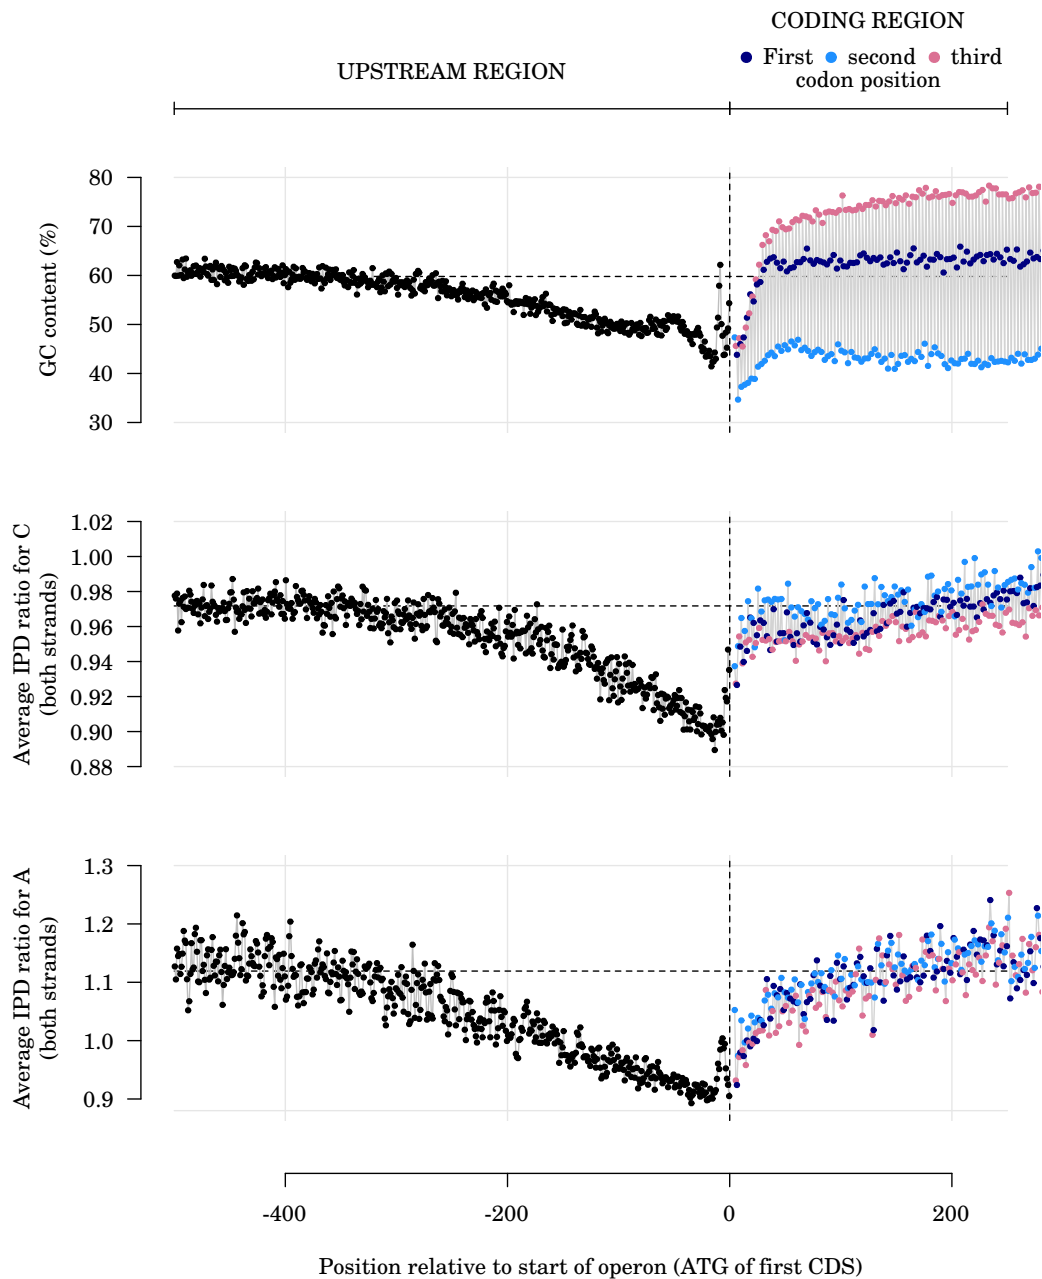

Supplementary Figure S5: Profiles of nucleotide composition and average IPD ratios for adenosines and cytosines around the start position of operon-leading CDS. IPD ratios (inter-pulse duration ratios between the sequenced based and an in-silico control) are related to base modifications, with high IPD ratios suggesting base modification. Analysis of the IPD ratios is complex, since a modified base can influence the IPD ratios of neighbouring bases. Thus, the trend observed for IPD ratios for cytosines could (at least partially) reflect the trend observed for neighbouring m6A, even if the cytosines are not themselves modified. Vertical dashed lines show the limit between upstream regions and the first codon of the leading CDS of predicted operons. Plotted values are averaged over each position relative to the leading CDS initiation codon based on operons predicted in the reference genome. Horizontal dashed lines show the genome-wide average values. Values for the three first bases on the coding sequences (usually ATG) are dropped from the plot to keep the y-scale reasonably narrow.

APPENDIX

Epigenetics and adaptation

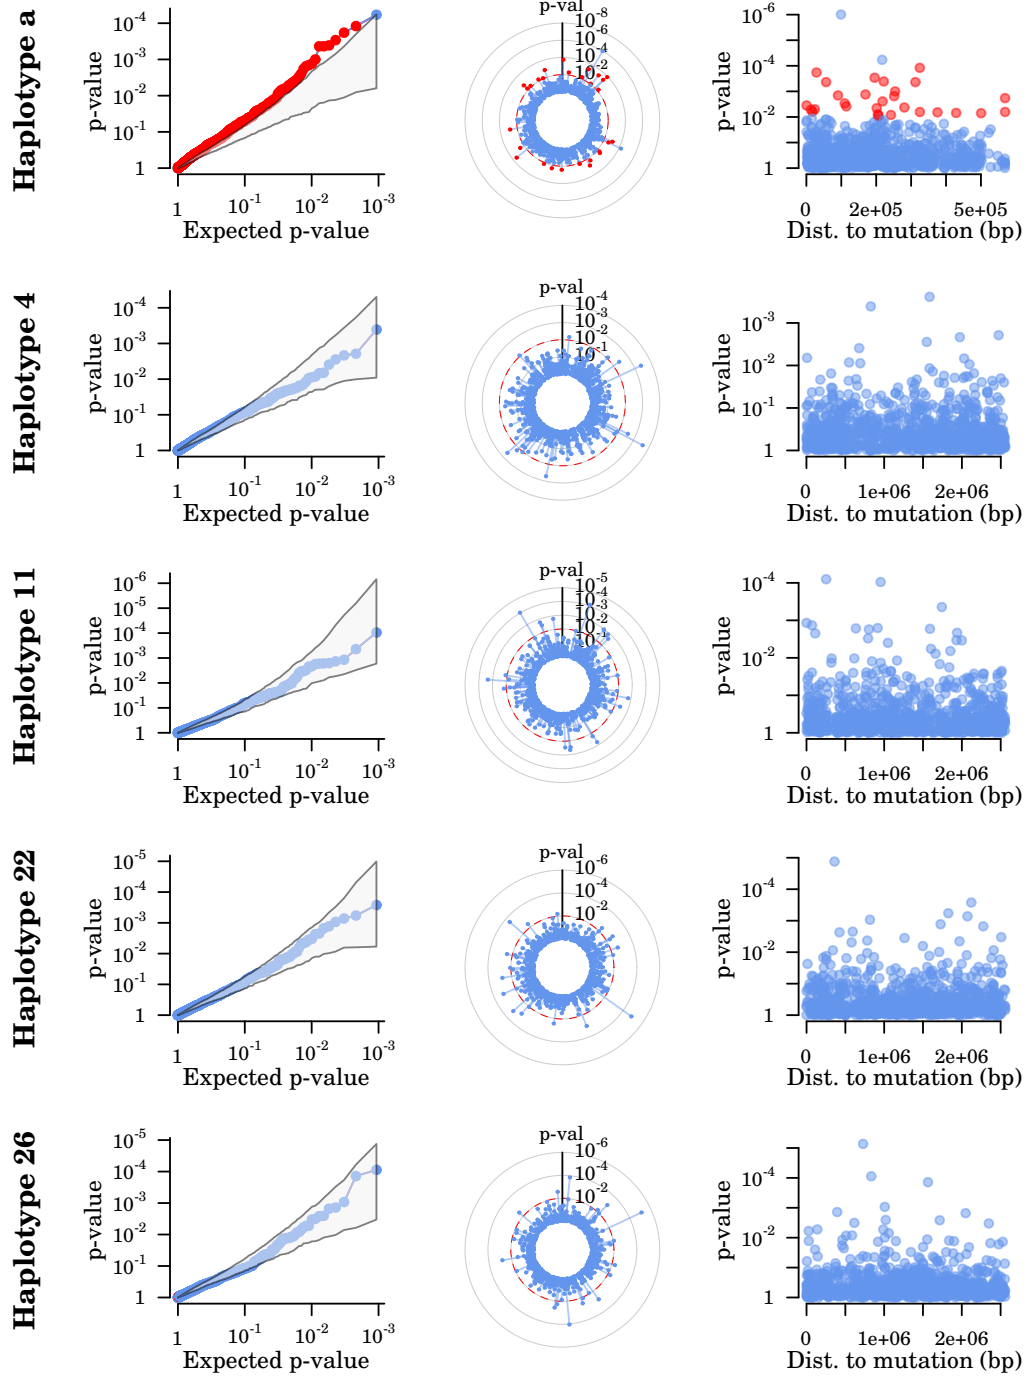

(a) m6A



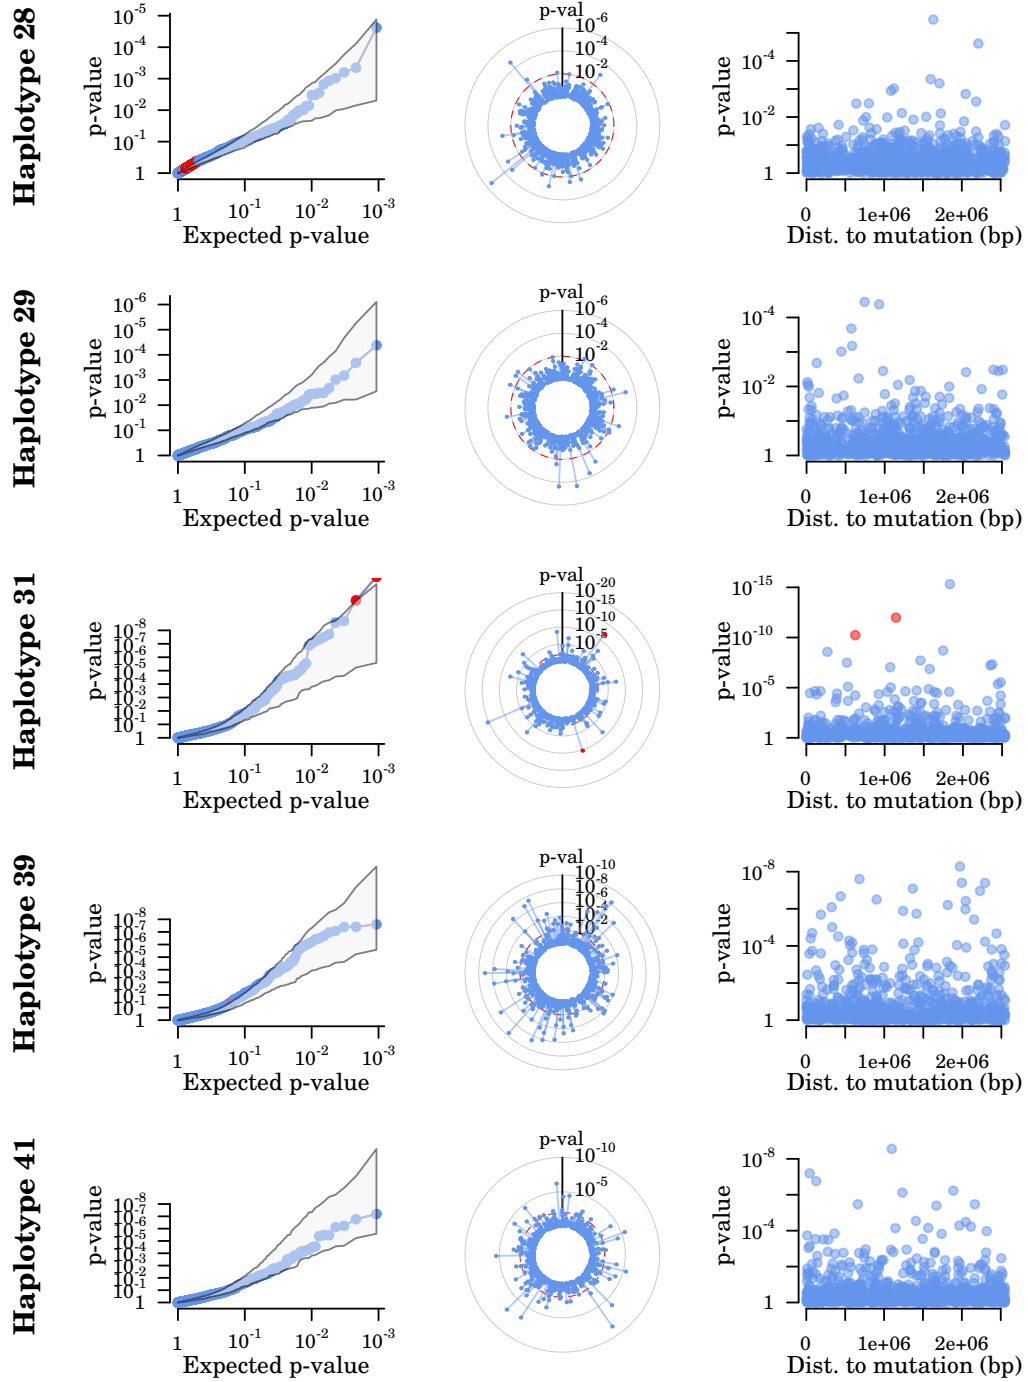

(b) m6A

APPENDIX

Epigenetics and adaptation

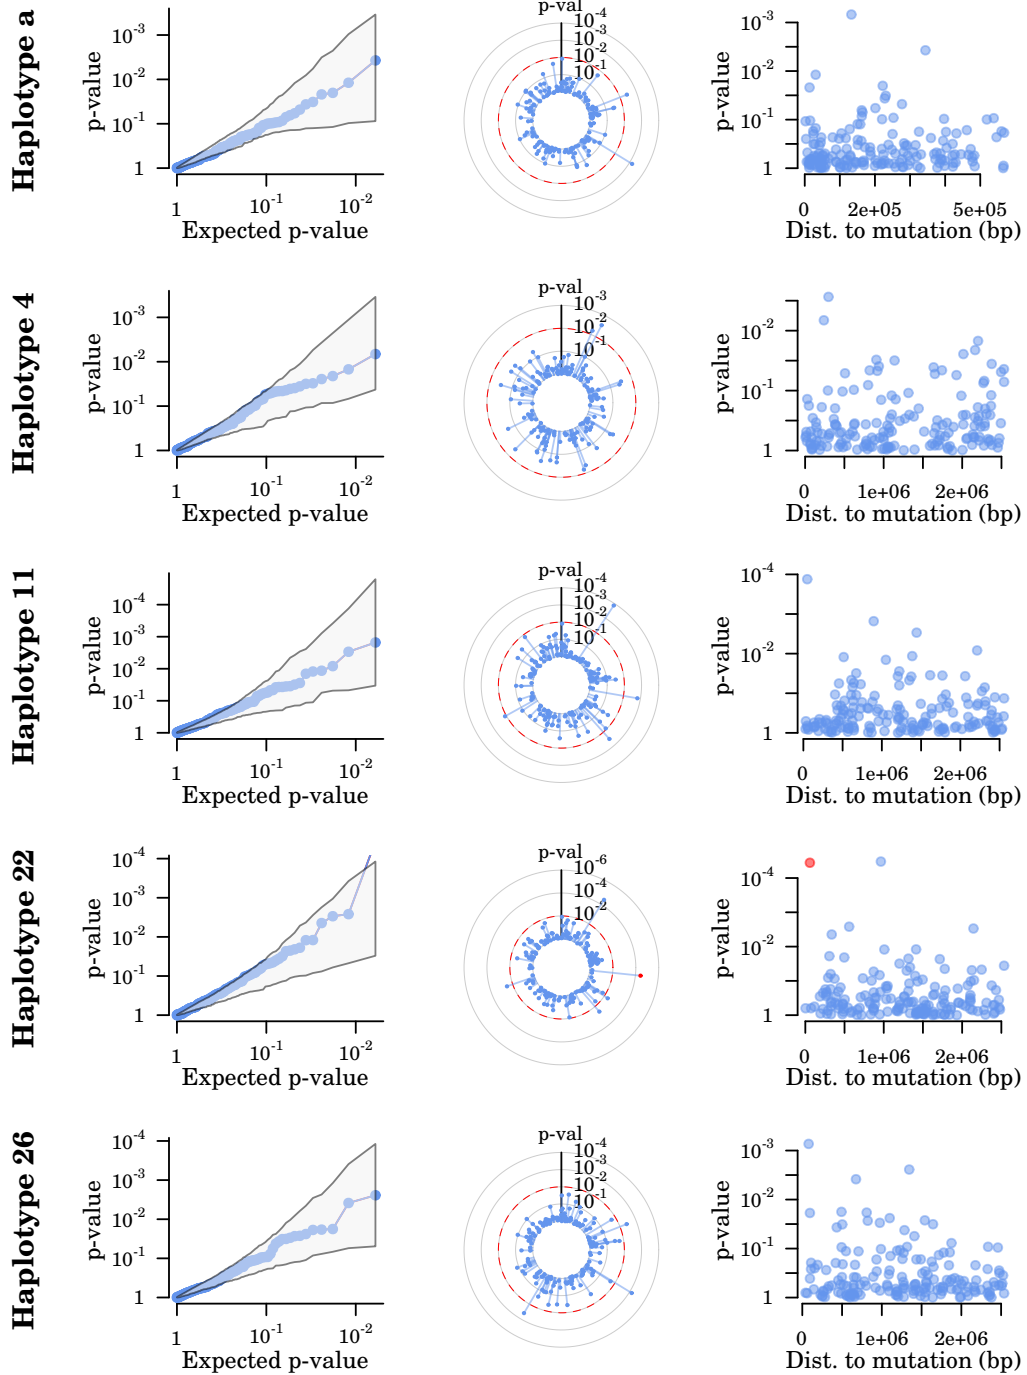

(c) m4C

APPENDIX

Epigenetics and adaptation

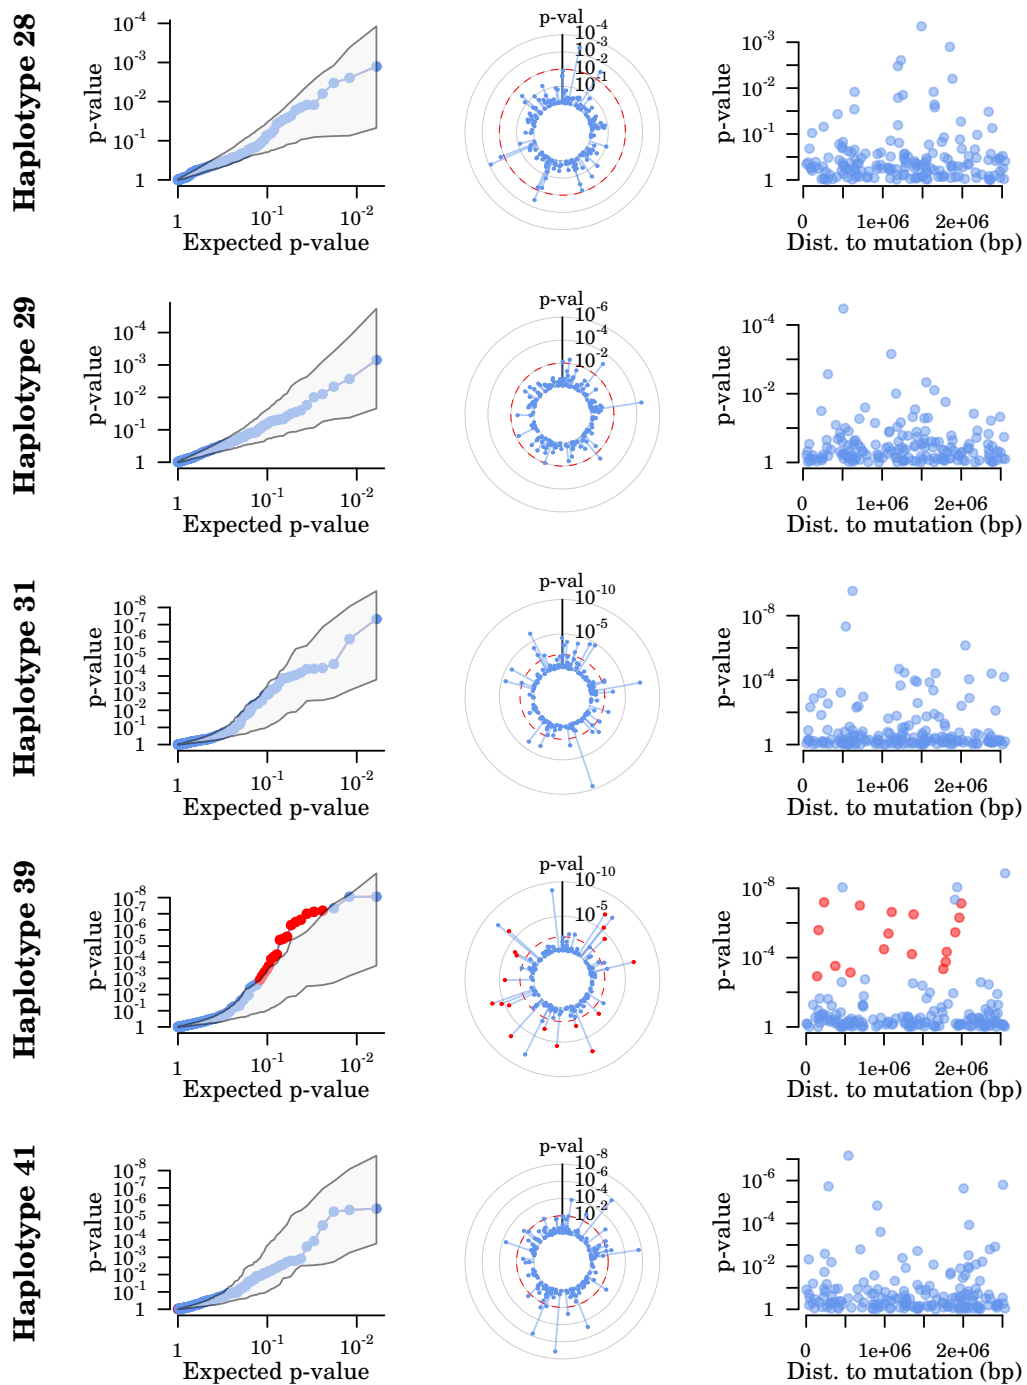

(d) m4C

Supplementary Figure S6: Association between genetic and epigenetic changes. Each row corresponds to one genetic locus or haplotype. Left column, comparison between inflation for observed p-values and the 95 % (one-tailed) envelope of inflation for p-values from permuted datasets. Middle column, genomic map of the epiloci and their associated p-values, with *oriC* at the top of the chromosome. Red points indicate an epiloci for which the observed p-value is  $< 0.01$  and is above the 95 % inflation permutation envelope. Right column, distribution of epiloci p-values in relation to their genomic distance to the genetic mutation. For the haplotype *a*, the distance is the distance to the closest mutation.

**m6A**

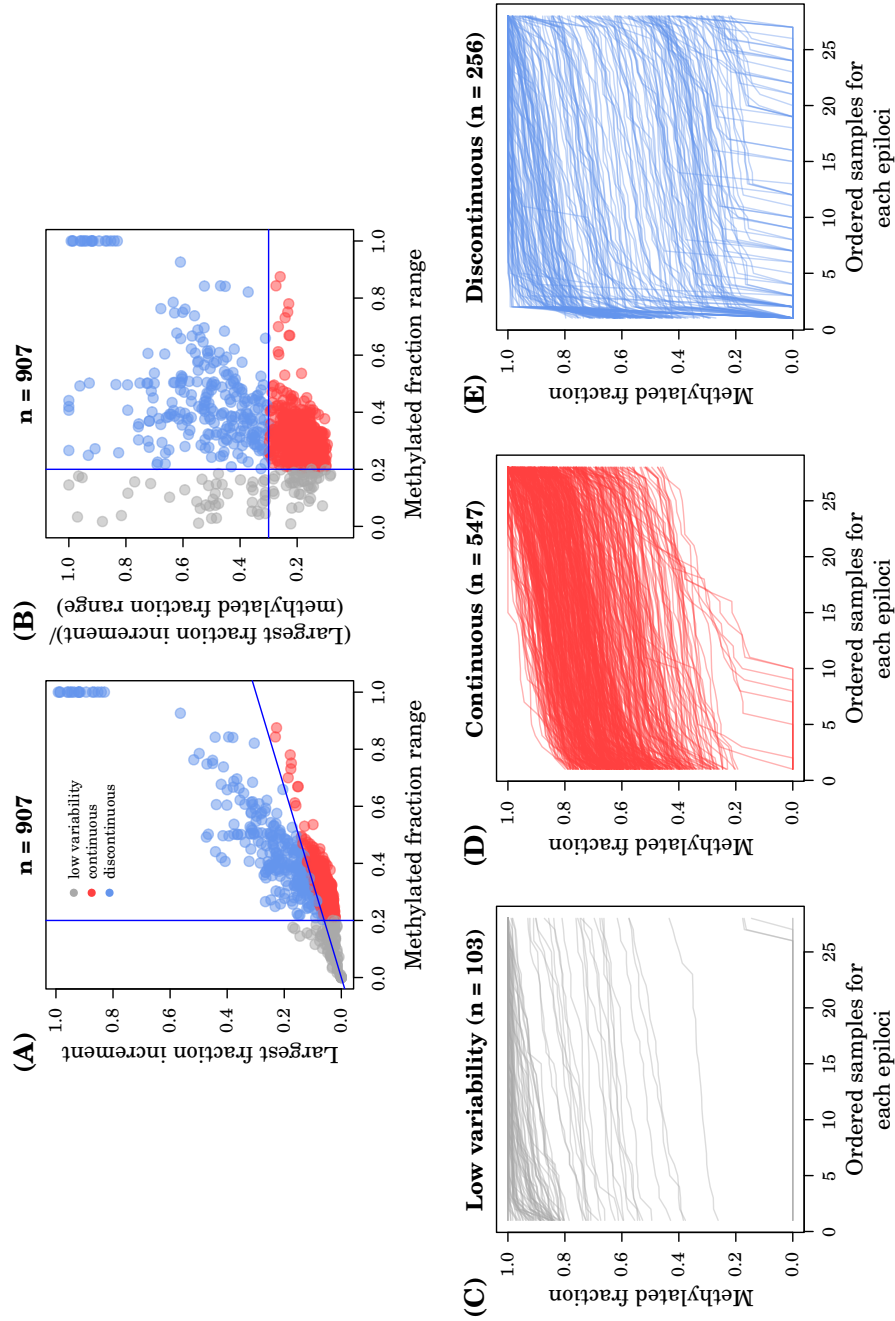

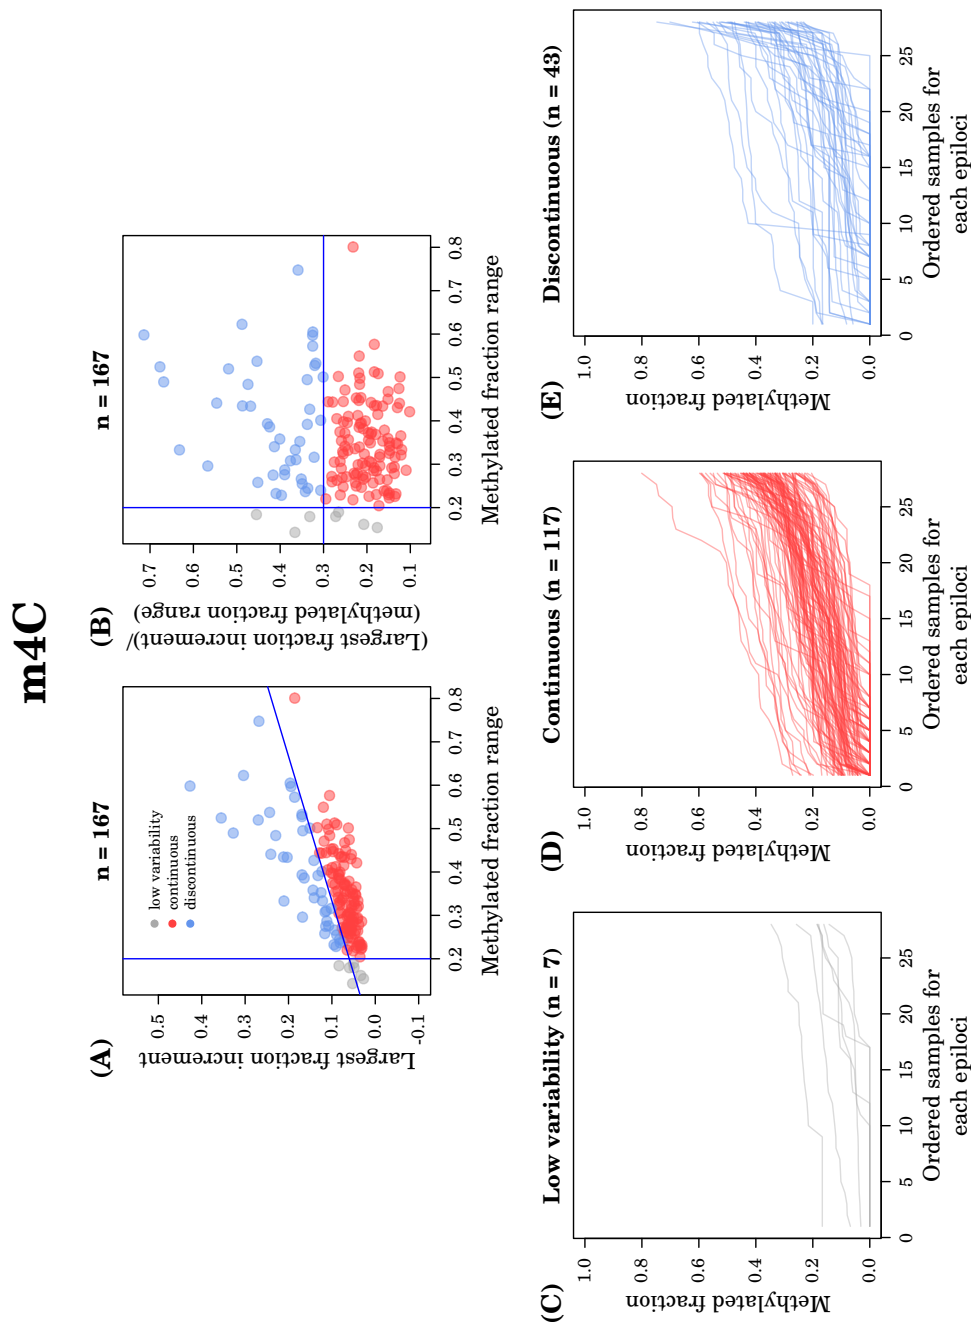

Supplementary Figure S7: Classification of epiloci of interest based on their methylation profiles. Epiloci of interest were m6A exhibiting incomplete methylation in at least one strain (“low-meth m6A”) and clustered m4C detected with the kernel density approach. A,B: classification of epiloci based on their profiles of ordered methylated fractions in the 28 evolved strains. Epiloci with fraction range less than 0.2 are classified as *low variability* (light grey). Among the remaining epiloci, epiloci with a largest fraction increment less than 0.3 times their fraction range are classified as *continuous* (red) while others are classified as *discontinuous* (blue). C,D,E: ordered methylation profiles for epiloci classified in each category. The numbers above each panel are the number of epiloci displayed in this panel.

APPENDIX

Epigenetics and adaptation

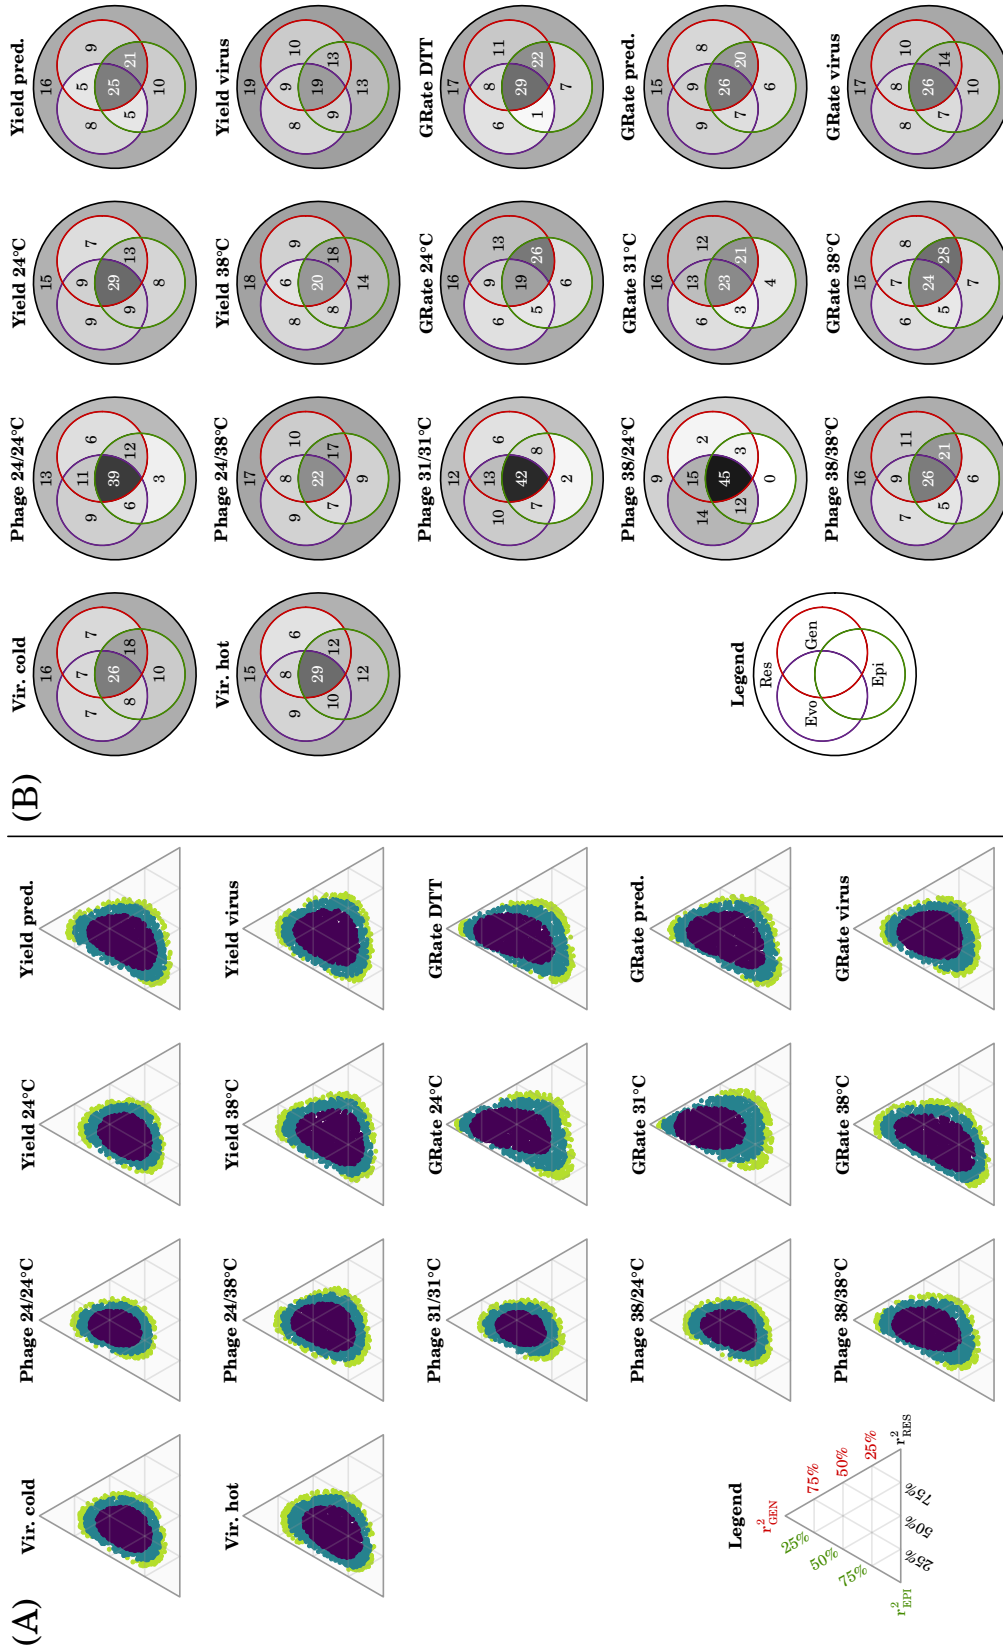

Supplementary Figure S8: Variance decomposition for each phenotypic trait, taking into account the fixed effect of haplotype group *a*. (A), 50 %, 80 % and 90 % credible surfaces for the estimates of the genetic, epigenetic and residuals components in total phenotypic variance. (B), point estimates for joint and disjoint variance components described by evolutionary treatment, genetics and epigenetics (in % of total phenotypic variance). See Figure 6 for legend details.



APPENDIX

Epigenetics and adaptation

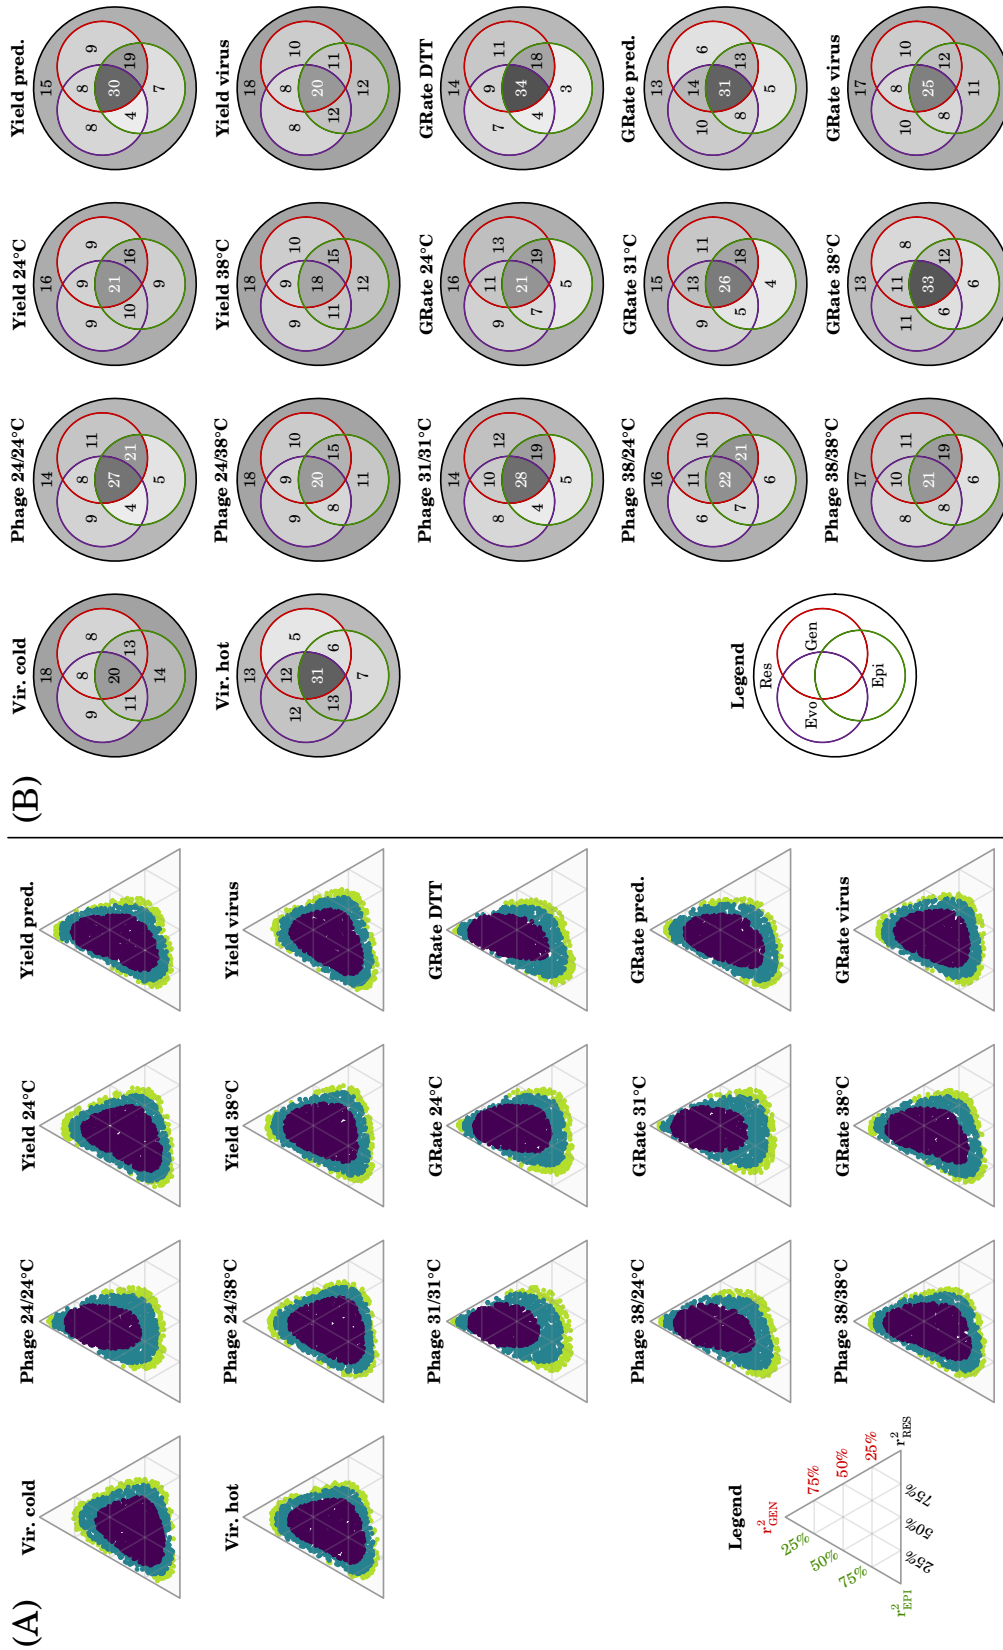

(a) Evolutionary treatments used for variance decomposition: 31 °C and 24–38°C

APPENDIX

Epigenetics and adaptation

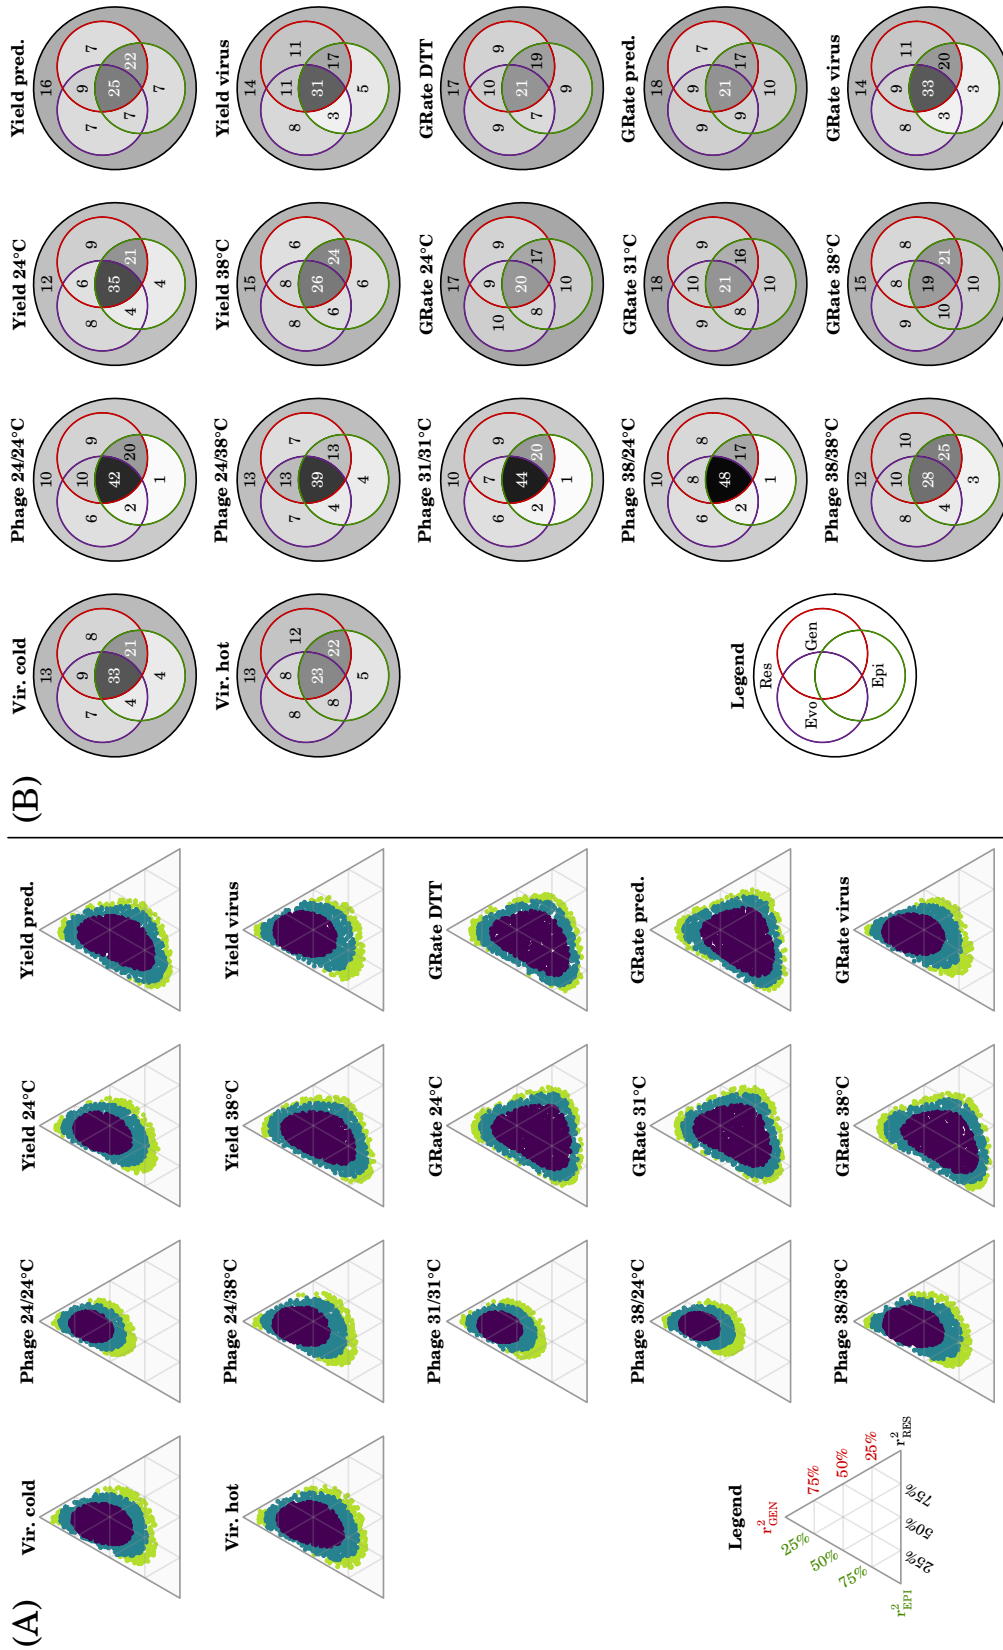

(b) Evolutionary treatments used for variance decomposition: 31 °C and 38 °C



APPENDIX

Epigenetics and adaptation

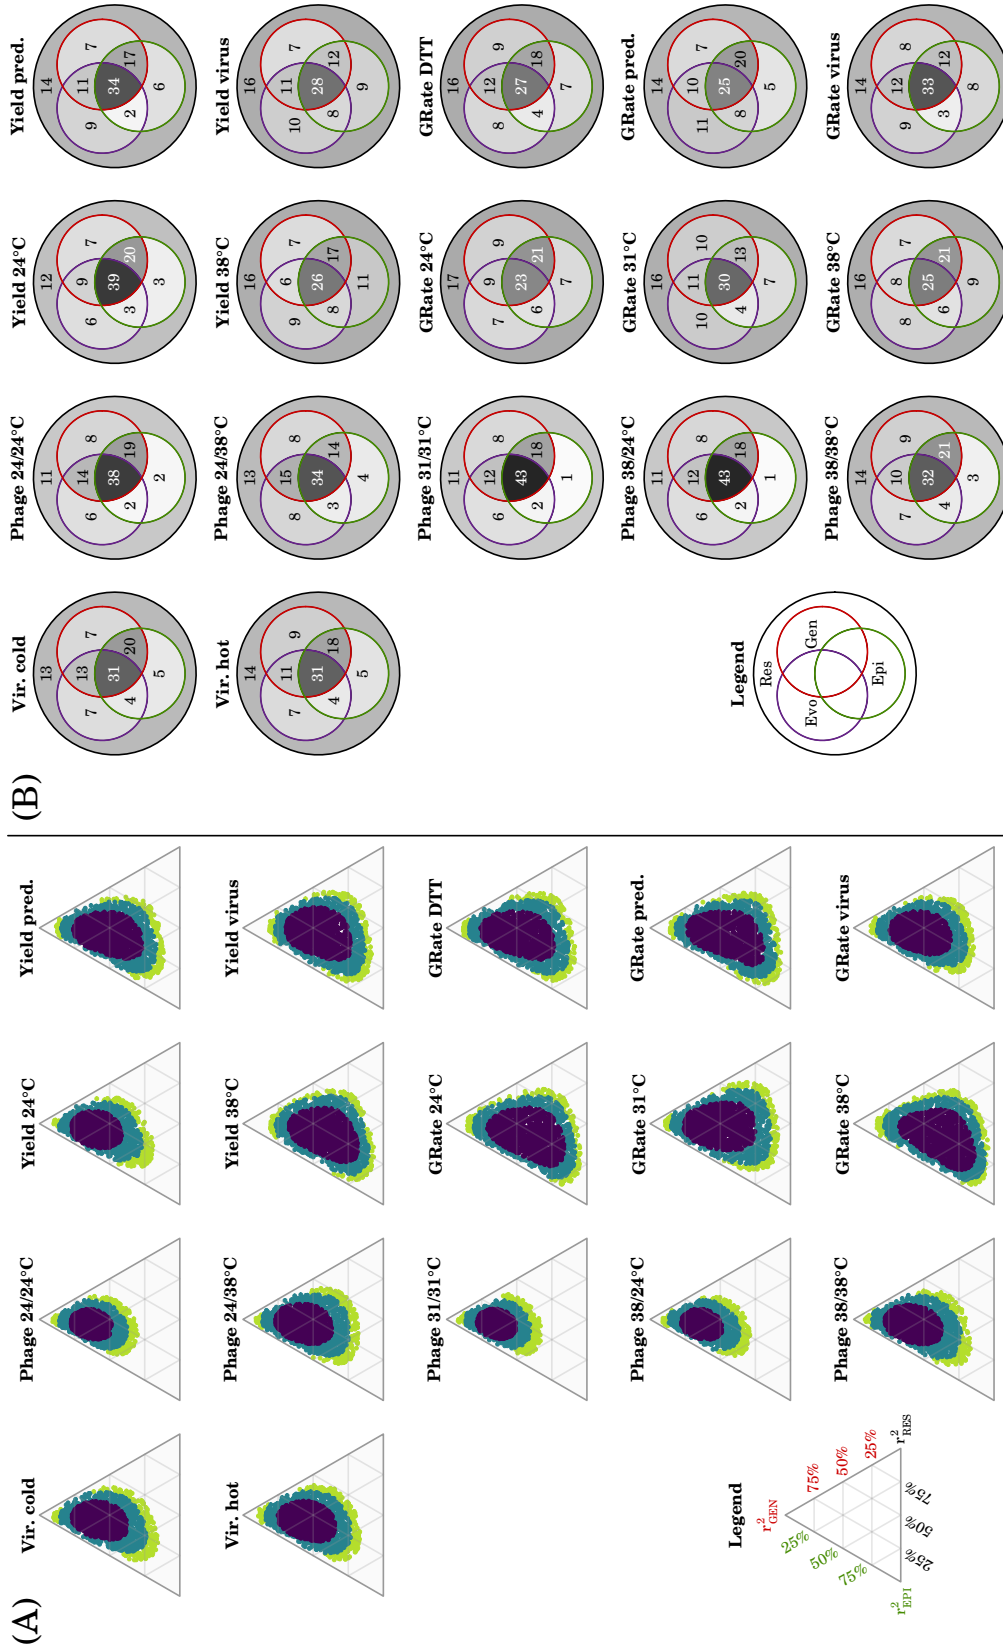

(c) Evolutionary treatments used for variance decomposition: 24–38°C and 38 °C

Supplementary Figure S9: Variance decomposition for each phenotypic trait, using data from pairs of evolutionary treatments. (A), 50 %, 80 % and 90 % credible surfaces for the estimates of the genetic, epigenetic and residuals components in total phenotypic variance. (B), point estimates for joint and disjoint variance components described by evolutionary treatment, genetics and epigenetics (in % of total phenotypic variance). See Figure 6 for legend details.

APPENDIX

Epigenetics and adaptation

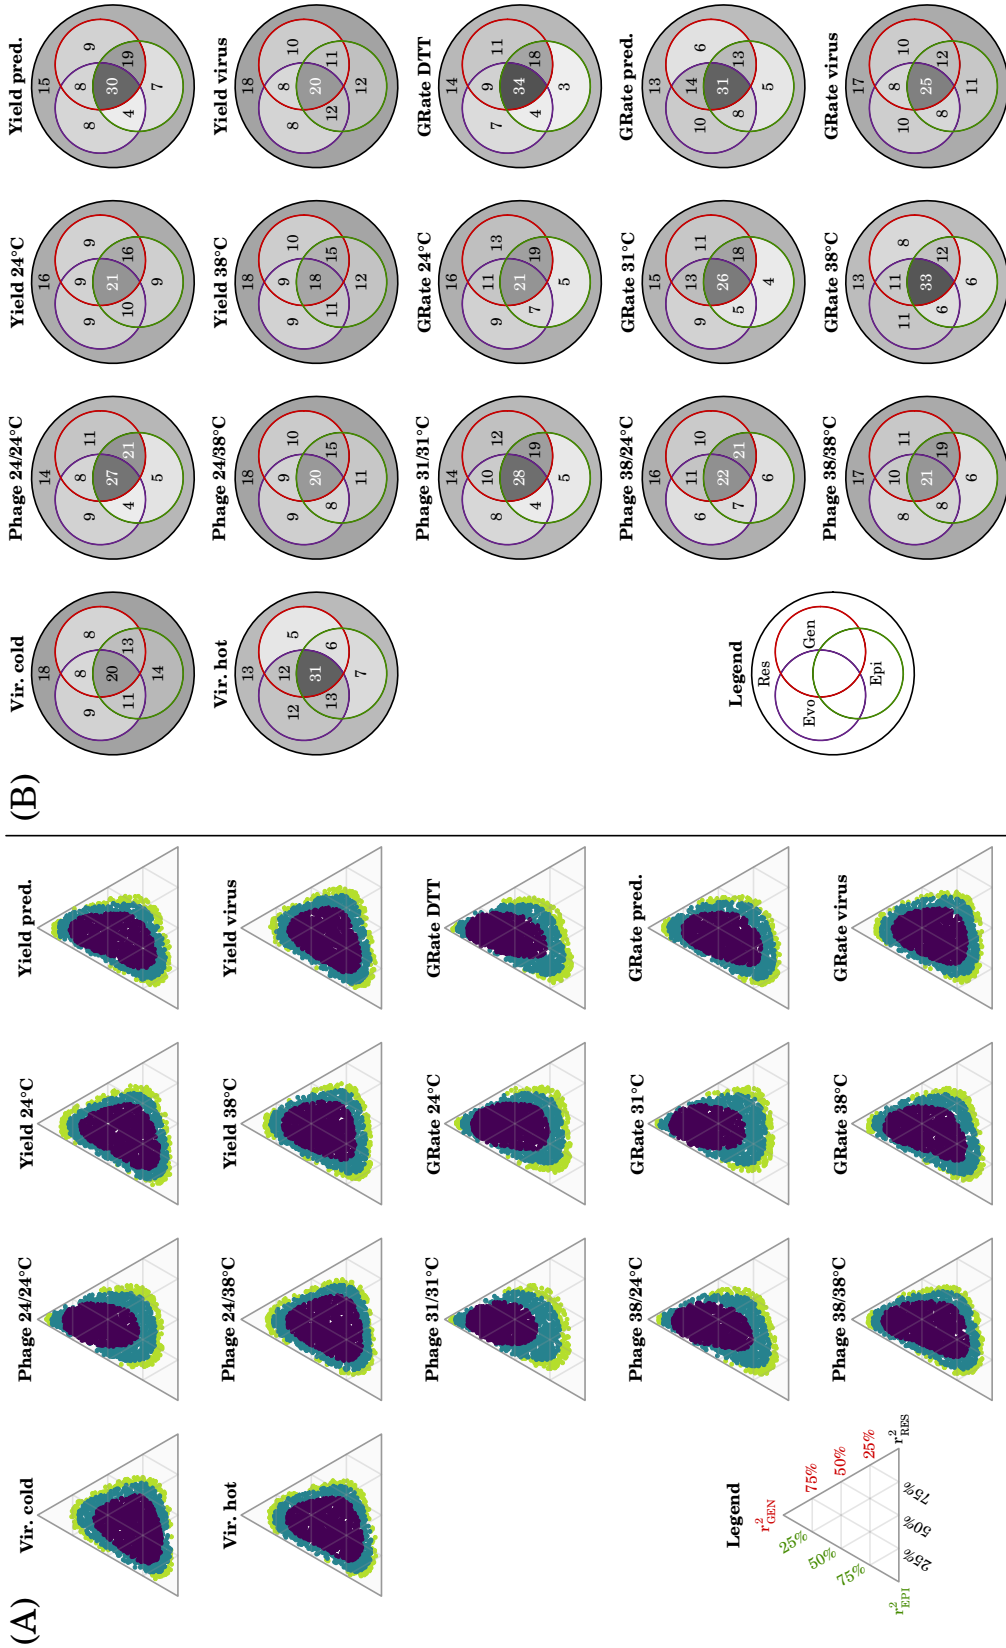

(a) Evolutionary treatments used for variance decomposition: 31 °C and 24–38°C (with haplotype *a* as fixed effect)

APPENDIX

Epigenetics and adaptation



(b) Evolutionary treatments used for variance decomposition: 31 °C and 38 °C (with haplotype *a* as fixed effect)

APPENDIX

Epigenetics and adaptation

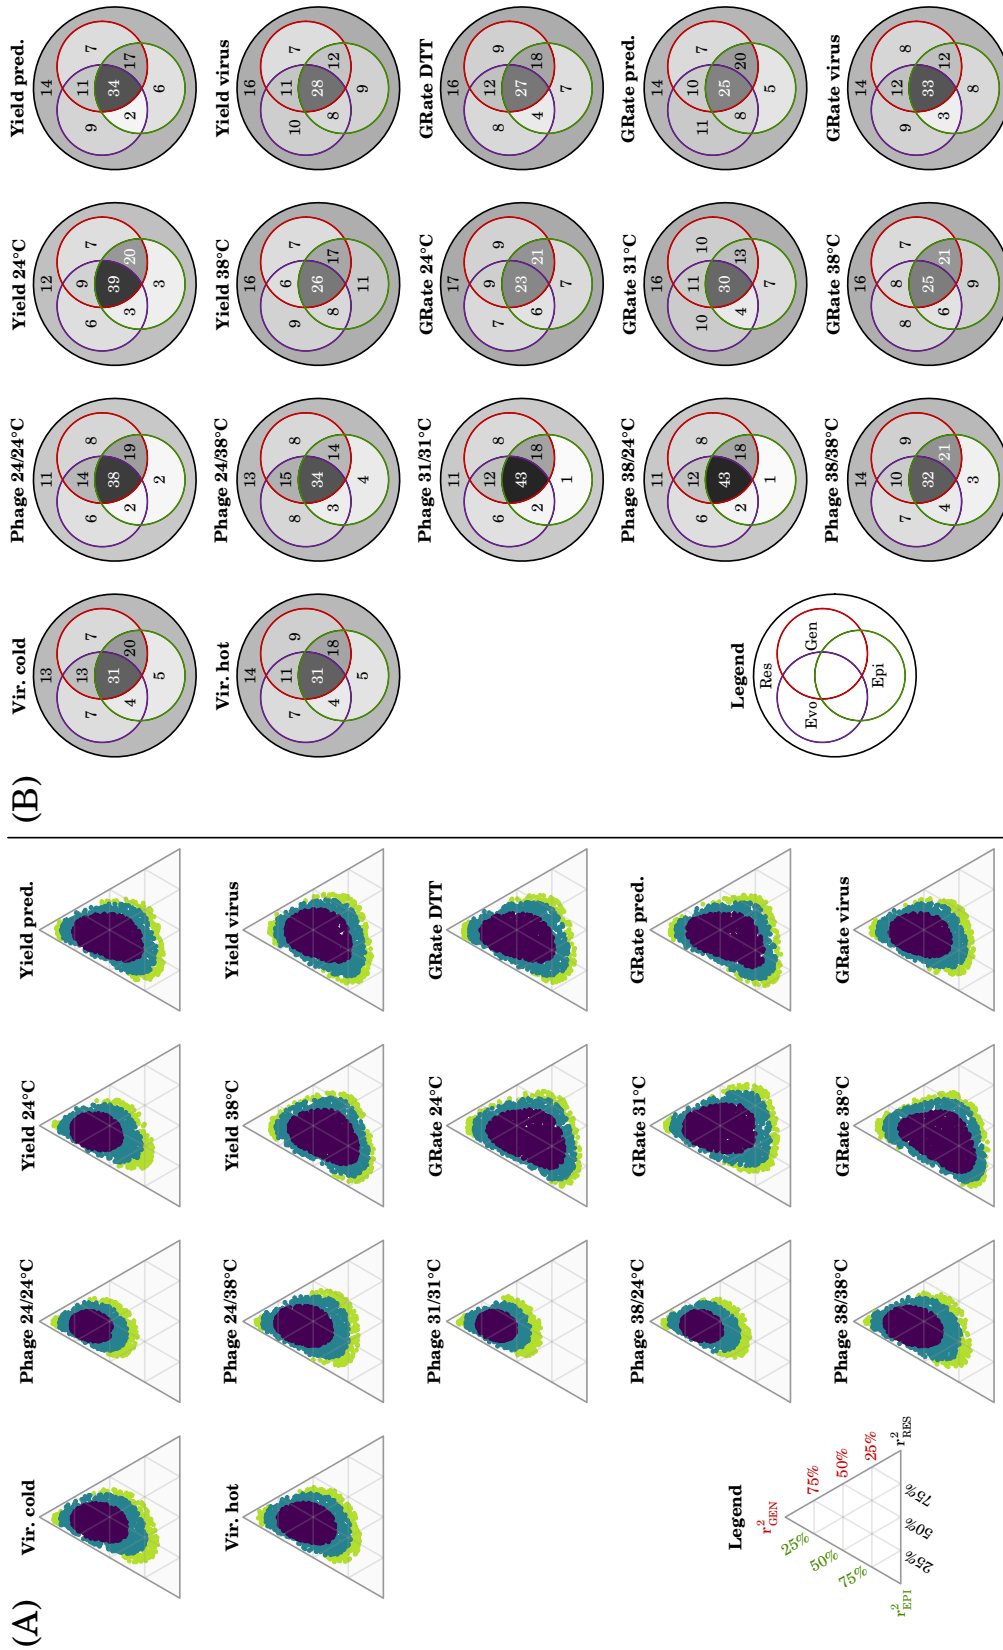

APPENDIX

Epigenetics and adaptation

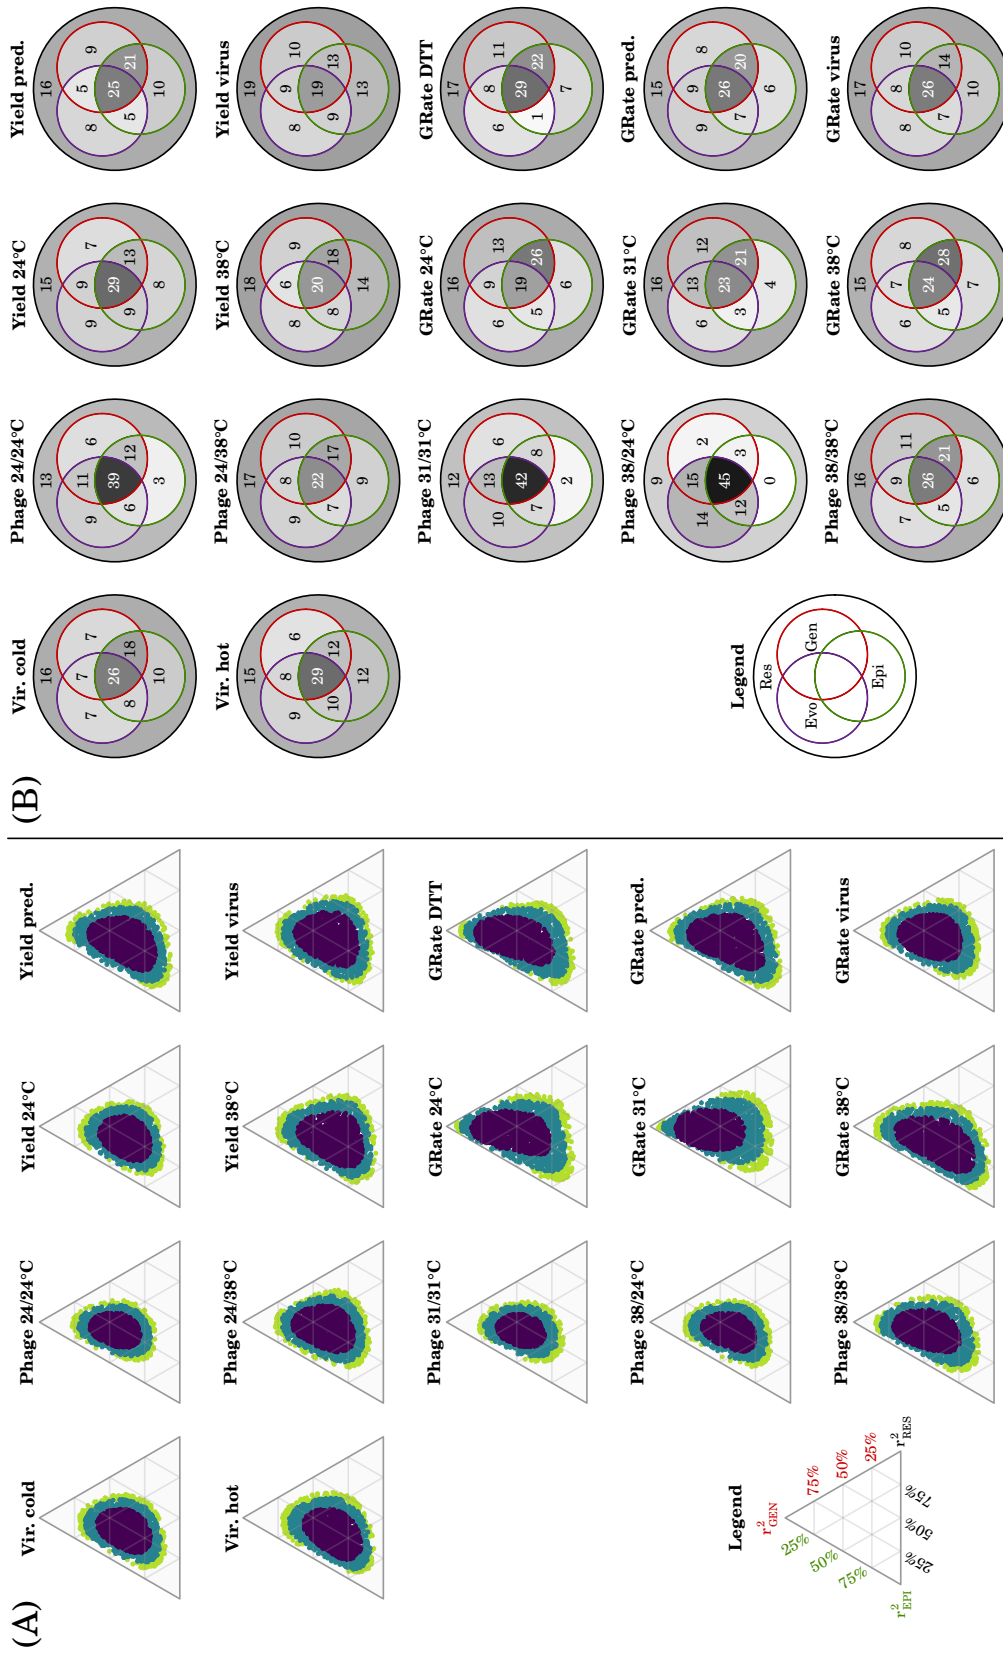

Supplementary Figure S11: Variance decomposition for each phenotypic trait, taking into account the fixed effect of locus 39. (A), 50 %, 80 % and 90 % credible surfaces for the estimates of the genetic, epigenetic and residuals components in total phenotypic variance. (B), point estimates for joint and disjoint variance components described by evolutionary treatment, genetics and epigenetics (in % of total phenotypic variance). See Figure 6 for legend details.



APPENDIX

Epigenetics and adaptation

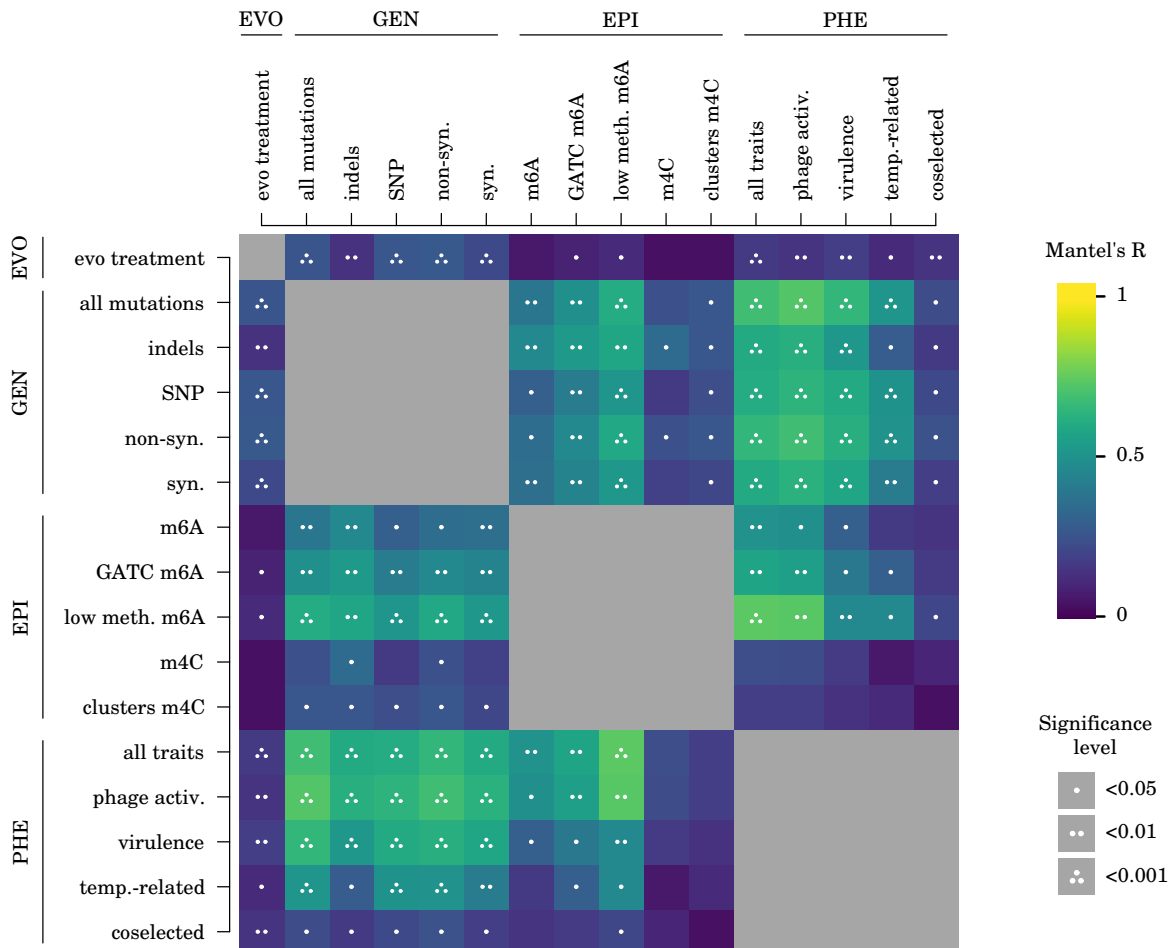

Supplementary Figure S12: Correlogram for distance measures based on treatment, genetic, epigenetic and phenotypic data. EVO, GEN, EPI, PHE: distance measures grouped in evolutionary treatment, genetic, epigenetic and phenotypic-based measures, respectively. In GEN: *non-syn.*, indels resulting in frame shift and non-synonymous SNPs; *syn.*, all other indels and SNPs. In EPI: *m6A*, all m6A fractions; *GATC m6A*, m6A fractions in GATC motifs; *low meth. m6A*, m6A fractions for GATC loci detected as partially methylated (see Methods); *m4C*, all m4C fractions; *clusters m4C*, m4C epialleles calculated for m4C clusters based on the kernel density permutation approach. In PHE: *phage activ.*, rate of activation of prophage KSP20; *temp.-related*, temperature-related traits from [Ketola et al. \(2013\)](#); *coselected*, coselected traits from [Ketola et al. \(2013\)](#).

APPENDIX

Epigenetics and adaptation

|     |               | EVO                   | GEN                   |                       |                       |                       |                       | EPI                  |                      |                       |                      |                      | PHE                   |                       |                       |                       |                      |                      |
|-----|---------------|-----------------------|-----------------------|-----------------------|-----------------------|-----------------------|-----------------------|----------------------|----------------------|-----------------------|----------------------|----------------------|-----------------------|-----------------------|-----------------------|-----------------------|----------------------|----------------------|
|     |               | evo treatment         | all mutations         | indels                | SNP                   | non-syn.              | syn.                  | m6A                  | GATC m6A             | low meth. m6A         | m4C                  | clusters m4C         | all traits            | phage activ.          | virulence             | temp.-related         | coselected           |                      |
| EVO | evo treatment |                       | <b>0.27</b><br><0.001 | <b>0.15</b><br>0.001  | <b>0.27</b><br><0.001 | <b>0.28</b><br><0.001 | <b>0.22</b><br><0.001 | 0.07<br>0.071        | <b>0.1</b><br>0.032  | <b>0.12</b><br>0.021  | 0.05<br>0.12         | 0.04<br>0.168        | <b>0.17</b><br><0.001 | <b>0.15</b><br>0.006  | <b>0.19</b><br>0.001  | <b>0.12</b><br>0.013  | <b>0.16</b><br>0.006 |                      |
|     | all mutations | <b>0.27</b><br><0.001 |                       |                       |                       |                       |                       | <b>0.4</b><br>0.006  | <b>0.5</b><br>0.001  | <b>0.62</b><br><0.001 | <b>0.25</b><br>0.057 | <b>0.27</b><br>0.019 | <b>0.7</b><br><0.001  | <b>0.73</b><br><0.001 | <b>0.67</b><br><0.001 | <b>0.52</b><br><0.001 | <b>0.23</b><br>0.016 |                      |
| GEN | indels        | <b>0.15</b><br>0.001  |                       |                       |                       |                       |                       | <b>0.48</b><br>0.004 | <b>0.54</b><br>0.002 | <b>0.6</b><br>0.002   | <b>0.35</b><br>0.012 | <b>0.27</b><br>0.03  | <b>0.61</b><br><0.001 | <b>0.63</b><br><0.001 | <b>0.53</b><br><0.001 | <b>0.3</b><br>0.04    | <b>0.17</b><br>0.049 |                      |
|     | SNP           | <b>0.27</b><br><0.001 |                       |                       |                       |                       |                       | <b>0.31</b><br>0.024 | <b>0.42</b><br>0.001 | <b>0.53</b><br><0.001 | <b>0.17</b><br>0.114 | <b>0.24</b><br>0.022 | <b>0.62</b><br><0.001 | <b>0.65</b><br><0.001 | <b>0.61</b><br><0.001 | <b>0.52</b><br><0.001 | <b>0.23</b><br>0.014 |                      |
|     | non-syn.      | <b>0.28</b><br><0.001 |                       |                       |                       |                       |                       | <b>0.36</b><br>0.012 | <b>0.48</b><br>0.002 | <b>0.6</b><br><0.001  | <b>0.25</b><br>0.05  | <b>0.27</b><br>0.014 | <b>0.66</b><br><0.001 | <b>0.7</b><br><0.001  | <b>0.64</b><br><0.001 | <b>0.51</b><br><0.001 | <b>0.25</b><br>0.01  |                      |
|     | syn.          | <b>0.22</b><br><0.001 |                       |                       |                       |                       |                       | <b>0.36</b><br>0.008 | <b>0.45</b><br>0.001 | <b>0.53</b><br><0.001 | <b>0.19</b><br>0.106 | <b>0.21</b><br>0.049 | <b>0.61</b><br><0.001 | <b>0.64</b><br><0.001 | <b>0.6</b><br><0.001  | <b>0.42</b><br>0.002  | <b>0.19</b><br>0.028 |                      |
|     | m6A           | 0.07<br>0.071         | <b>0.4</b><br>0.006   | <b>0.48</b><br>0.004  | <b>0.31</b><br>0.024  | <b>0.36</b><br>0.012  | <b>0.36</b><br>0.008  |                      |                      |                       |                      |                      |                       | <b>0.51</b><br>0.007  | <b>0.5</b><br>0.01    | <b>0.31</b><br>0.039  | 0.17<br>0.151        | 0.15<br>0.108        |
| EPI | GATC m6A      | <b>0.1</b><br>0.032   | <b>0.5</b><br>0.001   | <b>0.54</b><br>0.002  | <b>0.42</b><br>0.001  | <b>0.48</b><br>0.002  | <b>0.45</b><br>0.001  |                      |                      |                       |                      |                      |                       | <b>0.59</b><br>0.004  | <b>0.57</b><br>0.006  | <b>0.4</b><br>0.018   | <b>0.3</b><br>0.046  | 0.18<br>0.074        |
|     | low meth. m6A | <b>0.12</b><br>0.021  | <b>0.62</b><br><0.001 | <b>0.6</b><br>0.002   | <b>0.53</b><br><0.001 | <b>0.6</b><br><0.001  | <b>0.53</b><br><0.001 |                      |                      |                       |                      |                      |                       | <b>0.75</b><br><0.001 | <b>0.74</b><br>0.002  | <b>0.48</b><br>0.006  | <b>0.48</b><br>0.01  | <b>0.21</b><br>0.038 |
|     | m4C           | 0.05<br>0.12          | 0.25<br>0.057         | <b>0.35</b><br>0.012  | 0.17<br>0.114         | <b>0.25</b><br>0.05   | 0.19<br>0.106         |                      |                      |                       |                      |                      |                       | 0.24<br>0.082         | 0.23<br>0.11          | 0.18<br>0.137         | 0.07<br>0.342        | 0.11<br>0.176        |
|     | clusters m4C  | 0.04<br>0.168         | <b>0.27</b><br>0.019  | <b>0.27</b><br>0.03   | <b>0.24</b><br>0.022  | <b>0.27</b><br>0.014  | <b>0.21</b><br>0.049  |                      |                      |                       |                      |                      |                       | 0.18<br>0.116         | 0.19<br>0.116         | 0.15<br>0.148         | 0.13<br>0.196        | -0.04<br>0.667       |
|     | all traits    | <b>0.17</b><br><0.001 | <b>0.7</b><br><0.001  | <b>0.61</b><br><0.001 | <b>0.62</b><br><0.001 | <b>0.66</b><br><0.001 | <b>0.61</b><br><0.001 | <b>0.51</b><br>0.007 | <b>0.59</b><br>0.004 | <b>0.75</b><br><0.001 | 0.24<br>0.082        | 0.18<br>0.116        |                       |                       |                       |                       |                      |                      |
| PHE | phage activ.  | <b>0.15</b><br>0.006  | <b>0.73</b><br><0.001 | <b>0.63</b><br><0.001 | <b>0.65</b><br><0.001 | <b>0.7</b><br><0.001  | <b>0.64</b><br><0.001 | <b>0.5</b><br>0.01   | <b>0.57</b><br>0.006 | <b>0.74</b><br>0.002  | 0.23<br>0.11         | 0.19<br>0.116        |                       |                       |                       |                       |                      |                      |
|     | virulence     | <b>0.19</b><br>0.001  | <b>0.67</b><br><0.001 | <b>0.53</b><br><0.001 | <b>0.61</b><br><0.001 | <b>0.64</b><br><0.001 | <b>0.6</b><br><0.001  | <b>0.31</b><br>0.039 | <b>0.4</b><br>0.018  | <b>0.48</b><br>0.006  | 0.18<br>0.137        | 0.15<br>0.148        |                       |                       |                       |                       |                      |                      |
|     | temp.-related | <b>0.12</b><br>0.013  | <b>0.52</b><br><0.001 | <b>0.3</b><br>0.04    | <b>0.52</b><br><0.001 | <b>0.51</b><br><0.001 | <b>0.42</b><br>0.002  | 0.17<br>0.151        | <b>0.3</b><br>0.046  | <b>0.48</b><br>0.01   | 0.07<br>0.342        | 0.13<br>0.196        |                       |                       |                       |                       |                      |                      |
|     | coselected    | <b>0.16</b><br>0.006  | <b>0.23</b><br>0.016  | <b>0.17</b><br>0.049  | <b>0.23</b><br>0.014  | <b>0.25</b><br>0.01   | <b>0.19</b><br>0.028  | 0.15<br>0.108        | 0.18<br>0.074        | <b>0.21</b><br>0.038  | 0.11<br>0.176        | -0.04<br>0.667       |                       |                       |                       |                       |                      |                      |

Supplementary Figure S13: Correlogram (values) for distance measures based on treatment, genetic, epigenetic and phenotypic data. In each cell, the top number is Mantel's R and the bottom number is the corresponding  $p$ -value. Cells with content in bold have  $p < 0.05$ . EVO, GEN, EPI, PHE: distance measures grouped in evolutionary treatment, genetic, epigenetic and phenotypic-based measures, respectively. In GEN: *non-syn.*, indels resulting in frame shift and non-synonymous SNPs; *syn.*, all other indels and SNPs. In EPI: *m6A*, all m6A fractions; *GATC m6A*, m6A fractions in GATC motifs; *low meth. m6A*, m6A fractions for GATC loci detected as partially methylated (see Methods); *m4C*, all m4C fractions; *clusters m4C*, m4C epialleles calculated for m4C clusters based on the kernel density permutation approach. In PHE: *phage activ.*, rate of activation of prophage KSP20; *temp.-related*, temperature-related traits from Ketola et al. (2013); *coselected*, coselected traits from Ketola et al. (2013).
